# Supplementary material
Source: PubMed Central journal article supplement (PMC3171749)

# Supporting Information

## Application of a Double aza-Michael Reaction in a “*Click, Click, Cy-Click*” Strategy: From Bench to Flow

Qin Zang,<sup>a</sup> Salim Javed,<sup>a</sup> Farman Ullah,<sup>b</sup> Aihua Zhou,<sup>a</sup> Christopher A. Knudtson,<sup>a</sup> Danse Bi,<sup>a</sup> Fatima Z. Basha,<sup>c</sup> Michael G. Organ<sup>b,\*</sup> and Paul R. Hanson<sup>a,\*</sup>

<sup>a</sup> Department of Chemistry, University of Kansas, 1251 Wescoe Hall Drive, Lawrence, KS 66045-7582 and the Center for Chemical Methodologies and Library Development at the University of Kansas (KU-CMLD), 2034 Becker Drive, Delbert M. Shankel Structural Biology Center, Lawrence, KS 66047-3761

<sup>b</sup> Department of Chemistry, York University, 4700 Keele Street, Toronto, ON, M3J 1P3 (Canada)

<sup>c</sup> H. E. J. Research Institute of Chemistry, International Center for Chemical and Biological Sciences, University of Karachi, Pakistan

For Prof. Paul R. Hanson: Fax: (+1) 785-864-5396, e-mail: phanson@ku.edu

For Prof. Michael G. Organ: Fax: (+1) 416-736-5936, e-mail: organ@yorku.ca

### Table of Contents

Experimental Procedures and Characterization Data: *SI-2* to *SI-4*

Spectral Data: *SI-5* to *SI-30*

## Procedure for Sulfonamides 2.

To a RB flask containing racemic TBS-protected serine methyl ester (1.1 equiv) was added  $\text{CH}_2\text{Cl}_2$  (0.25 M) and  $\text{Et}_3\text{N}$  (3 equiv). This mixture was allowed to stir for several minutes until soluble, cooled to  $0\text{ }^\circ\text{C}$ , and 2-chloroethanesulfonyl chloride (1 equiv) was added drop-wise over several minutes. The solution was slowly warmed to rt, and stirred overnight. The reaction mixture was quenched with 10% HCl and extracted with  $\text{CH}_2\text{Cl}_2$ . The combined organic layers were washed with saturated aqueous  $\text{NaHCO}_3$ , brine, and dried ( $\text{Na}_2\text{SO}_4$ ). The solution was filtered, and concentrated under reduced pressure to afford crude vinyl sulfonamide **2** as a clear, viscous oil. The crude product was submitted to the following reaction without further purification.

$^1\text{H}$  NMR (500 MHz,  $\text{CDCl}_3$ ):  $\delta$  6.57 (dd,  $J = 16.5, 9.9$  Hz, 1H), 6.25 (d,  $J = 16.5$  Hz, 1H), 5.91 (d,  $J = 9.9$  Hz, 1H), 5.21 (d,  $J = 8.7$  Hz, 1H), 4.09 – 4.04 (m, 2H), 3.88 (dd,  $J = 10.9, 4.0$  Hz, 1H), 3.77 (s, 3H), 0.86 (s, 9H), 0.06 (s, 3H).

$^{13}\text{C}$  NMR (126 MHz,  $\text{CDCl}_3$ ):  $\delta$  170.5, 136.5, 126.3, 64.8, 57.6, 52.6, 25.6, -5.5, -5.7.

FTIR (thin film)  $\text{cm}^{-1}$ : 3290, 2955, 2930, 2858, 1749, 1342, 1256, 1138, 1113, 837.

HRMS: calculated for  $\text{C}_{12}\text{H}_{26}\text{NO}_5\text{SSi}$  ( $\text{M}+\text{H}$ ) $^+$  324.1301; found 324.1288 (TOF MS ES+).

## General Procedure for Tertiary Sulfonamides 3.

To the crude sulfonamide **2** (1 equiv) was added  $\text{CH}_3\text{CN}$  (0.1M) and  $\text{K}_2\text{CO}_3$  (1.2 equiv) followed by the dropwise addition of benzyl bromide (1.2 equiv). This mixture was allowed to stir at  $60\text{ }^\circ\text{C}$  for 12–14 hrs. The reaction was cooled to rt, filtered through a pad of celite/silica and concentrated under reduced pressure to afford crude tertiary sulfonamide **3** as a dark orange oil. The crude product was purified by flash column chromatography on silica gel (eluent: hexane-EtOAc, 5:1).

Methyl 3-((*tert*-butyldimethylsilyl)oxy)-2-(*N*-(4-methylbenzyl)vinylsulfonamido)propanoate (**3a**):

$^1\text{H}$  NMR (500 MHz,  $\text{CDCl}_3$ ):  $\delta$  7.29 (d,  $J = 8.0$  Hz, 2H), 7.12 (d,  $J = 7.8$  Hz, 2H), 6.53 (dd,  $J = 16.6, 9.9$  Hz, 1H), 6.21 (d,  $J = 16.6$  Hz, 1H), 5.89 (d,  $J = 9.9$  Hz, 1H), 4.54 (dd,  $J = 7.0, 4.6$  Hz, 1H), 4.49 (d,  $J = 16.1$  Hz, 1H), 4.45 (d,  $J = 16.1$  Hz, 1H), 4.01 (dd,  $J = 10.8, 7.0$  Hz, 1H), 3.96 (dd,  $J = 10.8, 4.6$  Hz, 1H), 3.66 (s, 3H), 2.33 (s, 3H), 0.84 (s, 9H), -0.01 (s, 3H), -0.06 (s, 3H).

$^{13}\text{C}$  NMR (126 MHz,  $\text{CDCl}_3$ ):  $\delta$  170.0, 137.1, 135.6, 134.0, 128.9, 128.0, 126.4, 62.3, 61.4, 52.1, 49.9, 25.7, 21.1, 18.1, -5.7, -5.8.

FTIR (thin film)  $\text{cm}^{-1}$ : 2953, 2930, 2856, 1747, 1342, 1258, 1150, 1119, 837, 777.

HRMS: calculated for  $\text{C}_{20}\text{H}_{37}\text{N}_2\text{O}_5\text{SSi}$  ( $\text{M}+\text{NH}_4$ ) $^+$  445.2192; found 445.2184 (TOF MS ES+).

Methyl 3-((*tert*-butyldimethylsilyl)oxy)-2-(*N*-(4-methoxybenzyl)vinylsulfonamido)propanoate (**3b**):

$^1\text{H}$  NMR (500 MHz,  $\text{CDCl}_3$ )  $\delta$  7.33 (d,  $J = 8.7$  Hz, 2H), 6.89 – 6.82 (m, 2H), 6.51 (dd,  $J = 16.6, 9.9$  Hz, 1H), 6.20 (d,  $J = 16.6$  Hz, 1H), 5.88 (d,  $J = 9.9$  Hz, 1H), 4.54 (dd,  $J = 7.0, 4.8$  Hz, 1H), 4.46 (d,  $J = 15.9$  Hz, 1H), 4.42 (d,  $J = 15.9$  Hz, 1H), 4.00 (dd,  $J = 10.9, 7.1$  Hz, 1H), 3.97 (dd,  $J = 10.9, 4.8$  Hz, 1H), 3.80 (s, 3H), 3.66 (s, 3H), 0.85 (s, 9H), 0.01 (s, 3H), -0.03 (s, 3H).

$^{13}\text{C}$  NMR (126 MHz,  $\text{CDCl}_3$ ):  $\delta$  170.0, 159.1, 135.7, 129.5, 129.0, 126.3, 113.6, 62.2, 61.3, 55.3, 52.1, 49.6, 25.7, 18.1, -5.7, -5.8.

FTIR (thin film)  $\text{cm}^{-1}$ : 2953, 2932, 2856, 1747, 1512, 1342, 1250, 1151, 837, 777.

HRMS: calculated for  $\text{C}_{20}\text{H}_{33}\text{NO}_6\text{SSiK}$  ( $\text{M}+\text{K}$ ) $^+$  482.1435; found 482.1429 (TOF MS ES+).

Methyl 2-(*N*-benzylvinylsulfonamido)-3-((*tert*-butyldimethylsilyloxy)propanoate (**3c**):

<sup>1</sup>H NMR (500 MHz, CDCl<sub>3</sub>) δ 7.41 (d, *J* = 7.4 Hz, 2H), 7.32 (t, *J* = 7.4 Hz, 2H), 7.25 (m, 1H), 6.54 (dd, *J* = 16.6, 9.9 Hz, 1H), 6.22 (d, *J* = 16.6 Hz, 1H), 5.91 (d, *J* = 9.9 Hz, 1H), 4.59 (dd, *J* = 6.9, 4.2 Hz, 1H), 4.54 (d, *J* = 16.5 Hz, 1H), 4.51 (d, *J* = 16.4 Hz, 1H), 4.03 (dd, *J* = 10.8, 6.9 Hz, 1H), 3.96 (dd, *J* = 10.8, 4.2 Hz, 1H), 3.67 (s, 3H), 0.83 (s, 9H), -0.03 (s, 3H), -0.09 (s, 3H).

<sup>13</sup>C NMR (126 MHz, CDCl<sub>3</sub>): δ 170.0, 137.3, 135.4, 128.2, 127.8, 127.4, 126.6, 62.4, 61.5, 52.1, 50.1, 25.7, 18.1, -5.8, -5.9.

FTIR (thin film) cm<sup>-1</sup>: 2953, 2930, 2856, 1745, 1342, 1254, 1150, 1119, 837, 777.

HRMS: calculated for C<sub>19</sub>H<sub>35</sub>N<sub>2</sub>O<sub>5</sub>SSi (M+NH<sub>4</sub>)<sup>+</sup> 431.2036; found 431.2051 (TOF MS ES+).

Methyl 3-((*tert*-butyldimethylsilyloxy)-2-(*N*-(4-chlorobenzyl)vinylsulfonamido)propanoate (**3d**):

<sup>1</sup>H NMR (500 MHz, CDCl<sub>3</sub>) δ 7.36 (d, *J* = 8.5 Hz, 2H), 7.31 – 7.27 (m, 2H), 6.51 (dd, *J* = 16.5, 9.9 Hz, 1H), 6.21 (d, *J* = 16.5 Hz, 1H), 5.93 (d, *J* = 9.9 Hz, 1H), 4.61 (dd, *J* = 6.6, 3.7 Hz, 1H), 4.52 (d, *J* = 16.9 Hz, 1H), 4.49 (d, *J* = 16.9 Hz, 1H), 4.05 (dd, *J* = 10.9, 6.7 Hz, 1H), 3.95 (dd, *J* = 10.9, 3.8 Hz, 1H), 3.69 (s, 3H), 0.82 (s, 9H), -0.02 (s, 3H), -0.09 (s, 3H).

<sup>13</sup>C NMR (126 MHz, CDCl<sub>3</sub>): δ 169.9, 136.2, 135.1, 133.1, 129.1, 128.3, 126.9, 62.6, 61.6, 52.2, 49.5, 25.7, 18.1, -5.8, -5.9.

FTIR (thin film) cm<sup>-1</sup>: 2953, 2930, 2856, 1745, 1493, 1342, 1254, 1151, 837, 770.

HRMS: calculated for C<sub>19</sub>H<sub>34</sub>ClN<sub>2</sub>O<sub>5</sub>SSi (M+NH<sub>4</sub>)<sup>+</sup> 465.1646; found 465.1630 (TOF MS ES+).

Methyl 3-((*tert*-butyldimethylsilyloxy)-2-(*N*-(4-fluorobenzyl)vinylsulfonamido)propanoate (**3e**):

<sup>1</sup>H NMR (500 MHz, CDCl<sub>3</sub>) δ 7.39 (dd, *J* = 8.6, 5.4 Hz, 2H), 7.01 (t, *J* = 8.7 Hz, 2H), 6.51 (dd, *J* = 16.5, 9.9 Hz, 1H), 6.21 (d, *J* = 16.5 Hz, 1H), 5.91 (d, *J* = 9.9 Hz, 1H), 4.60 (dd, *J* = 6.8, 4.0 Hz, 1H), 4.51 (d, *J* = 16.5 Hz, 1H), 4.48 (d, *J* = 16.4 Hz, 1H), 4.03 (dd, *J* = 10.9, 6.8 Hz, 1H), 3.95 (dd, *J* = 10.9, 4.0 Hz, 1H), 3.68 (s, 3H), 0.83 (s, 9H), -0.01 (s, 3H), -0.08 (s, 3H).

<sup>13</sup>C NMR (126 MHz, CDCl<sub>3</sub>): δ 170.0, 162.2 (d, <sup>1</sup>*J*<sub>CF</sub> = 245.5 Hz), 135.3, 133.2 (d, <sup>4</sup>*J*<sub>CF</sub> = 3.1 Hz), 129.5 (d, <sup>3</sup>*J*<sub>CF</sub> = 8.1 Hz), 126.7, 115.0 (d, <sup>2</sup>*J*<sub>CF</sub> = 21.5 Hz), 62.4, 61.5, 52.2, 49.4, 25.7, 18.1, -5.8, -5.9.

FTIR (thin film) cm<sup>-1</sup>: 2953, 2930, 2856, 1747, 1510, 1342, 1256, 1151, 837, 775.

HRMS: calculated for C<sub>19</sub>H<sub>31</sub>FNO<sub>5</sub>SSi (M+H)<sup>+</sup> 432.1676; found 432.1667 (TOF MS ES+).

Methyl 3-((*tert*-butyldimethylsilyloxy)-2-(*N*-(4-(trifluoromethyl)benzyl)vinylsulfonamido)propanoate (**3f**):

<sup>1</sup>H NMR (500 MHz, CDCl<sub>3</sub>) δ 7.58 (d, *J* = 8.4 Hz, 2H), 7.54 (d, *J* = 8.3 Hz, 2H), 6.54 (dd, *J* = 16.5, 9.9 Hz, 1H), 6.23 (d, *J* = 16.5 Hz, 1H), 5.96 (d, *J* = 9.9 Hz, 1H), 4.67 (dd, *J* = 6.1, 3.2 Hz, 1H), 4.62 (s, 2H), 4.09 (dd, *J* = 10.9, 6.1 Hz, 1H), 3.94 (dd, *J* = 10.9, 3.2 Hz, 1H), 3.72 (s, 3H), 0.77 (s, 9H), -0.07 (s, 3H), -0.17 (s, 3H).

<sup>13</sup>C NMR (126 MHz, CDCl<sub>3</sub>): δ 169.9, 142.3, 134.7, 129.5 (q, <sup>2</sup>*J*<sub>CF</sub> = 32.5 Hz), 127.5, 127.3, 126.3 (q, <sup>1</sup>*J*<sub>CF</sub> = 271.9 Hz), 125.1 (q, <sup>3</sup>*J*<sub>CF</sub> = 3.7 Hz), 62.9, 61.8, 52.3, 49.8, 25.6, 18.0, -6.0, -6.0.

FTIR (thin film) cm<sup>-1</sup>: 2955, 2932, 2855, 2858, 1747, 1344, 1327, 1151, 1124, 1067, 837, 773.

HRMS: calculated for C<sub>20</sub>H<sub>30</sub>F<sub>3</sub>NO<sub>5</sub>SSiNa (M+Na)<sup>+</sup> 504.1464; found 504.1460 (TOF MS ES+).

Methyl 2-(*N*-(4-methylbenzyl)vinylsulfonamido)acrylate (**4**):

<sup>1</sup>H NMR (400 MHz, CDCl<sub>3</sub>) δ 7.18 (d, *J* = 8.0 Hz, 2H), 7.12 (d, *J* = 7.9 Hz, 2H), 6.73 (dd, *J* = 16.5, 9.9 Hz, 1H), 6.31 (d, *J* = 16.6 Hz, 1H), 6.27 (s, 1H), 6.02 (d, *J* = 9.9 Hz, 1H), 5.68 (s, 1H), 4.50 (s, 2H), 3.79 (s, 3H), 2.33 (s, 3H).

Methyl 3-((*tert*-butyldimethylsilyl)oxy)-2-(*N*-(prop-2-yn-1-yl)vinylsulfonamido)propanoate (**6**):

To the crude sulfonamide **2** (1 equiv) was added DMF (0.1M), K<sub>2</sub>CO<sub>3</sub> (2 equiv) and NaI (2 equiv) followed by the addition of propargyl bromide (1.5 equiv). This was allowed to stir at 60 °C for 14 hrs. The reaction was cooled to rt and filtered through a pad of celite/silica and concentrated to afford crude tertiary sulfonamide **3** as a dark orange oil. The crude product was purified by flash column chromatography on silica gel (eluent: hexane-EtOAc, 5:1) to provide the product as pale yellow oil (79%).

<sup>1</sup>H NMR (500 MHz, CDCl<sub>3</sub>): δ 6.61 (dd, *J* = 16.5, 9.9 Hz, 1H), 6.28 (d, *J* = 16.5 Hz, 1H), 5.95 (d, *J* = 9.9 Hz, 1H), 4.59 (m, 1H), 4.27 (dd, *J* = 18.5, 2.4 Hz, 1H), 4.22 (dd, *J* = 18.5, 2.4 Hz, 1H), 4.18 (dd, *J* = 9.1, 3.6 Hz, 1H), 4.15 (dd, *J* = 9.1, 2.4 Hz, 1H), 3.75 (s, 3H), 2.26 (t, *J* = 2.4 Hz, 1H), 0.89 (s, 9H), 0.09 (s, 3H), 0.07 (s, 3H).

<sup>13</sup>C NMR (126 MHz, CDCl<sub>3</sub>): δ 169.7, 135.6, 126.8, 80.0, 71.8, 62.8, 60.9, 52.3, 35.4, 25.7, 18.1, -5.7, -5.9.

FTIR (thin film) cm<sup>-1</sup>: 3275, 2959, 1745, 1339, 1146, 972, 737, 565.

HRMS: calculated for C<sub>15</sub>H<sub>27</sub>NO<sub>5</sub>SSiNa (M+Na)<sup>+</sup> 384.1277; found 384.1256 (TOF MS ES+).

Methyl 3-((*tert*-butyldimethylsilyl)oxy)-2-(vinylsulfonamido)propanoate (**2**)

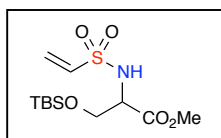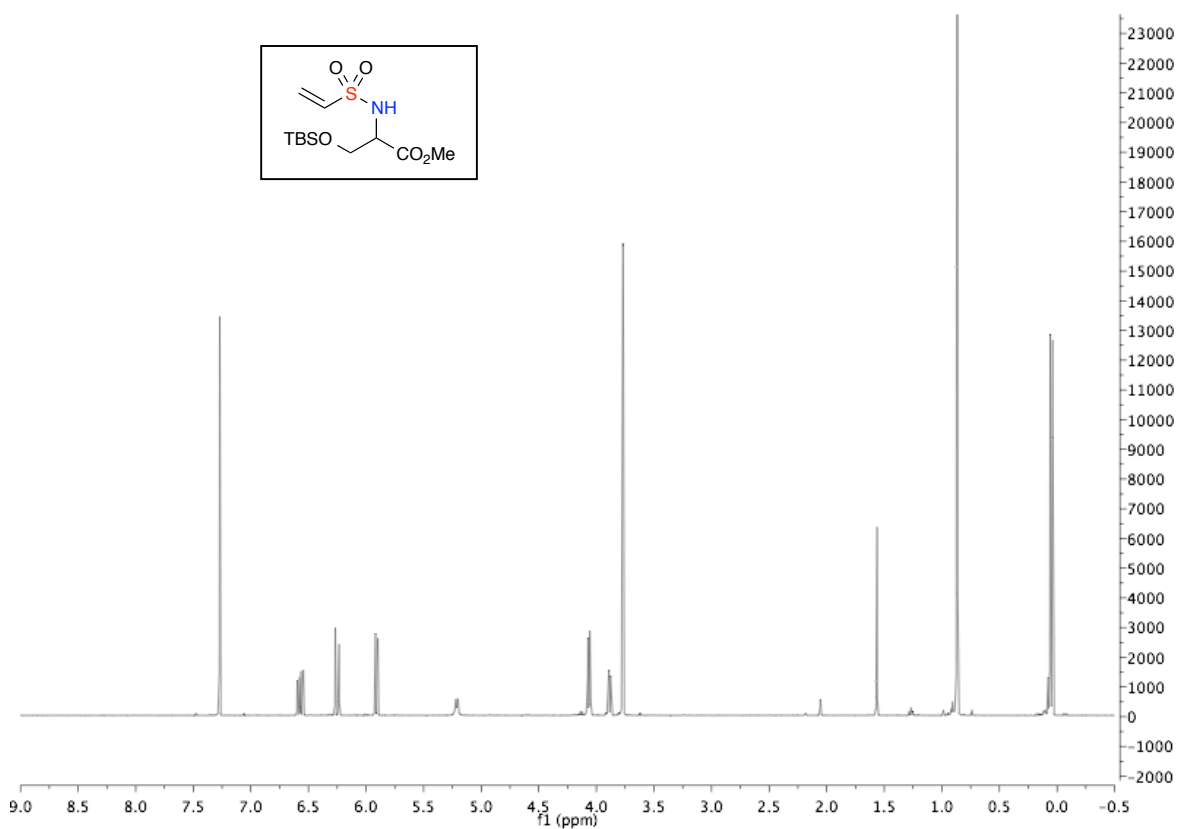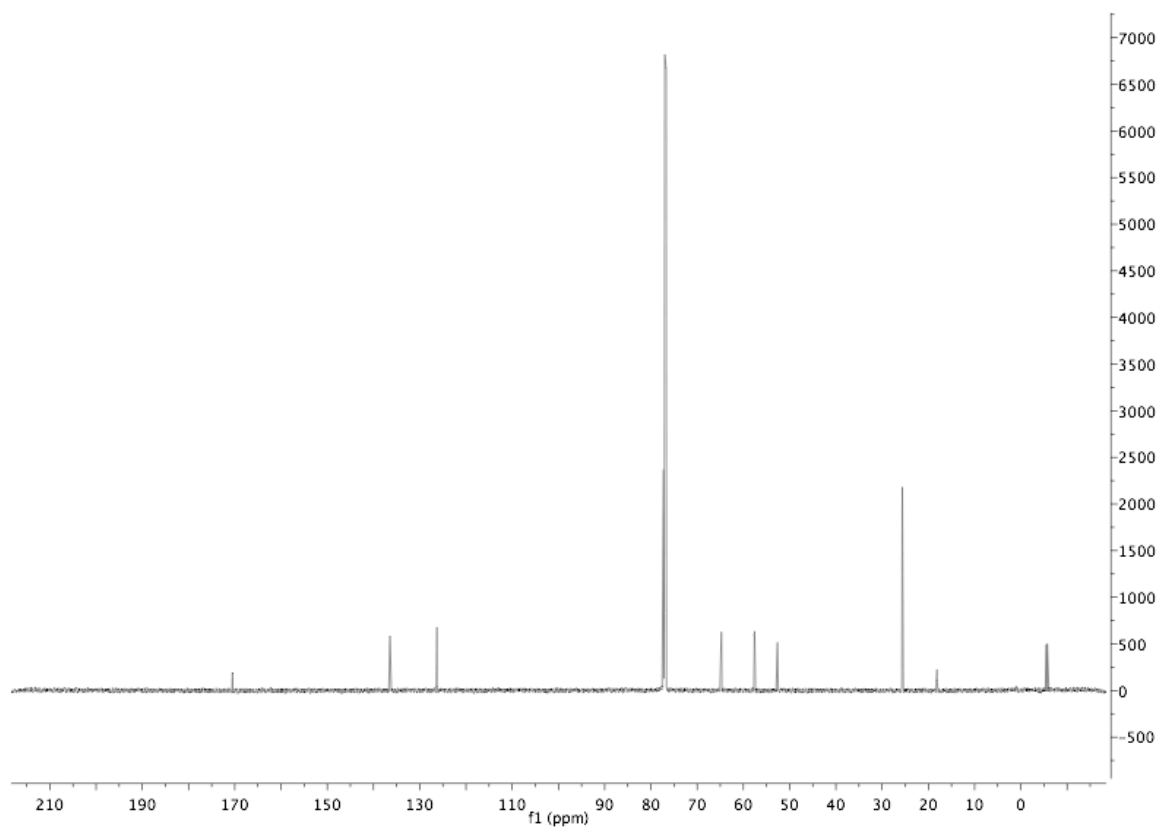

Methyl 3-((*tert*-butyldimethylsilyl)oxy)-2-(*N*-(4-methylbenzyl)vinylsulfonamido)propanoate (**3a**)

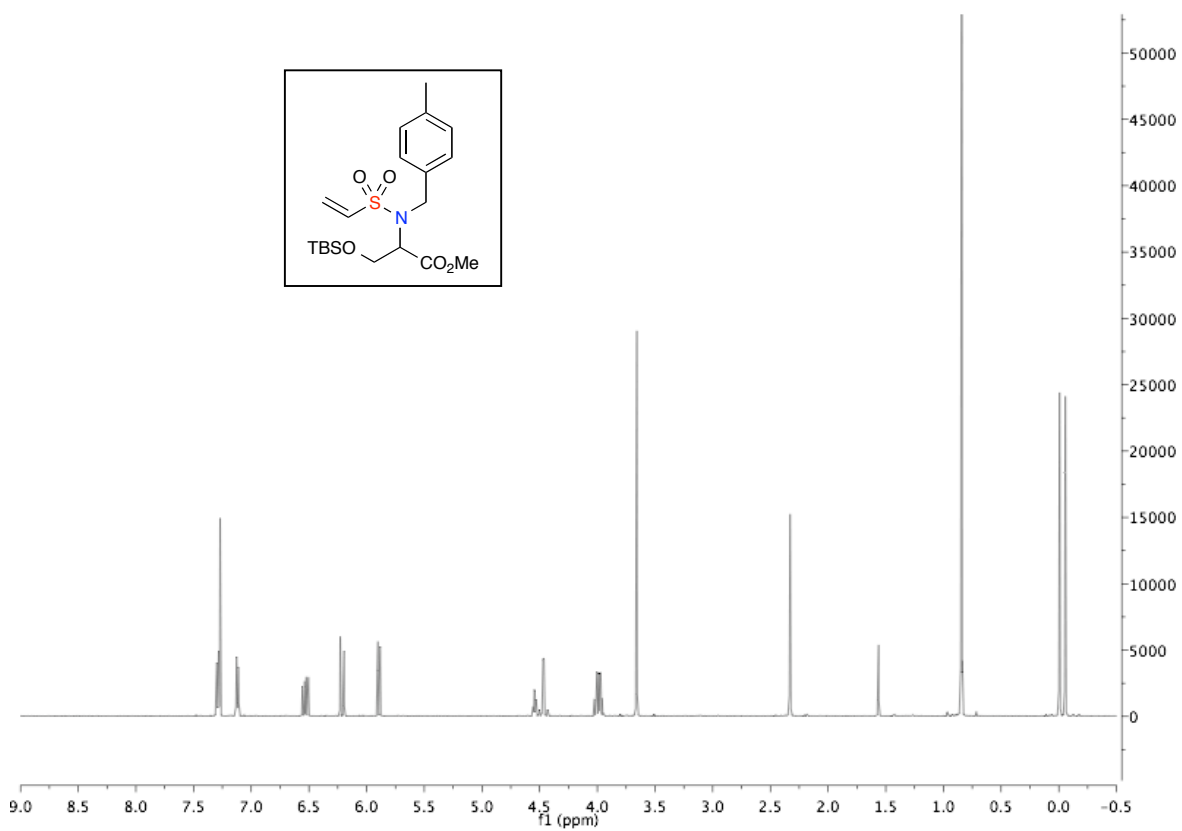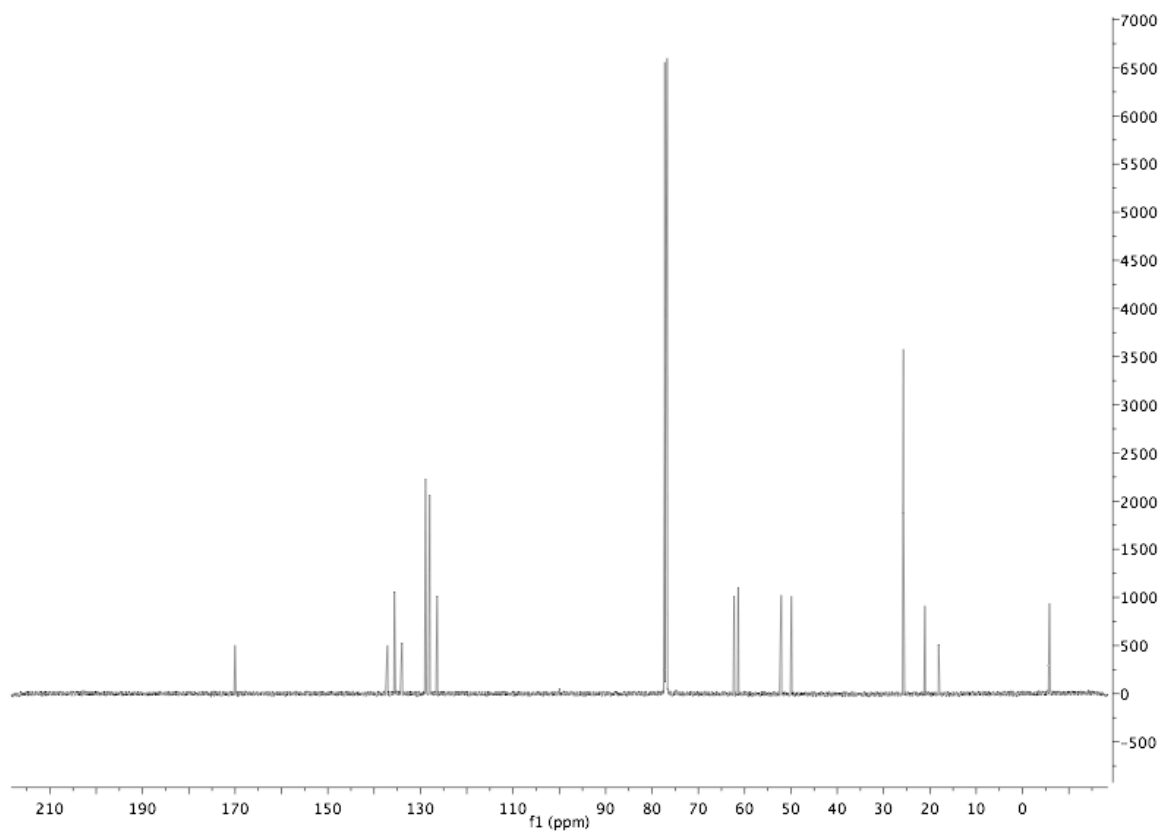

Methyl 3-((*tert*-butyldimethylsilyl)oxy)-2-(*N*-(4-methoxybenzyl)vinylsulfonamido)propanoate (**3b**)

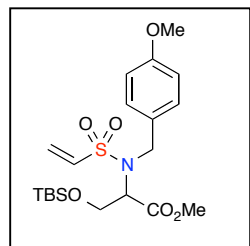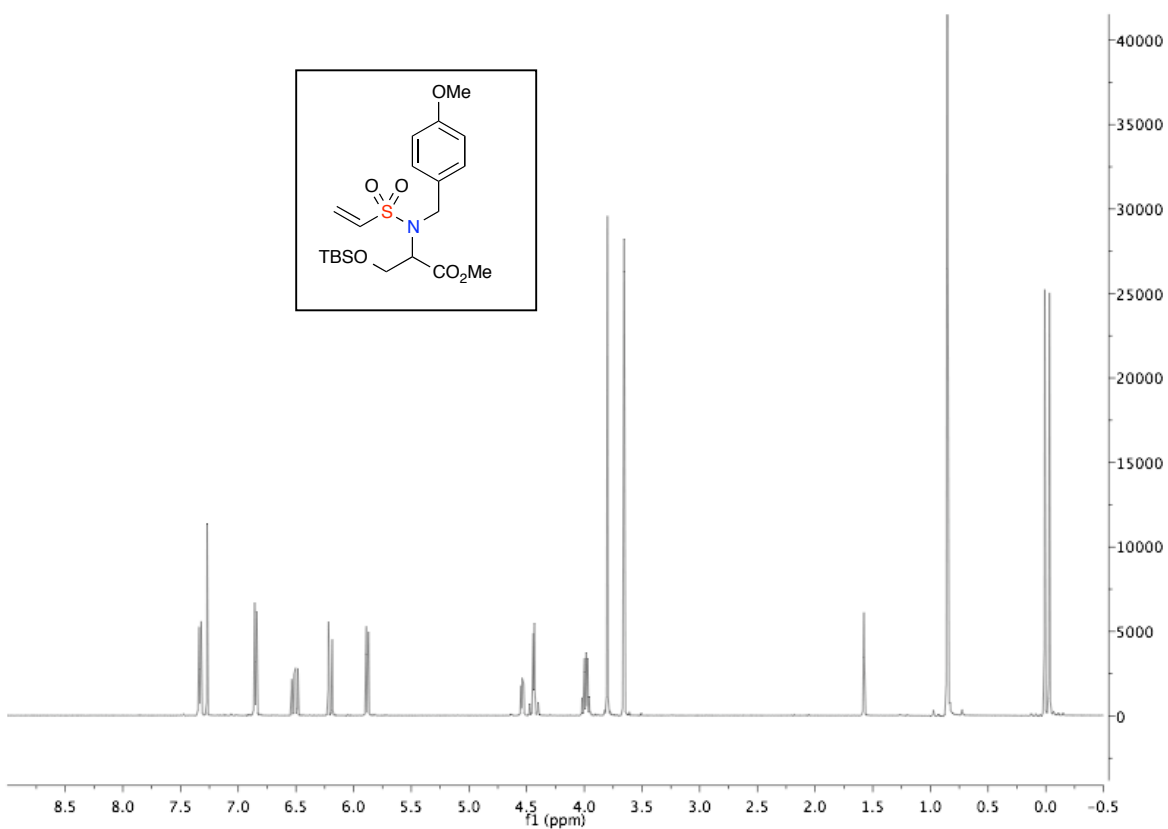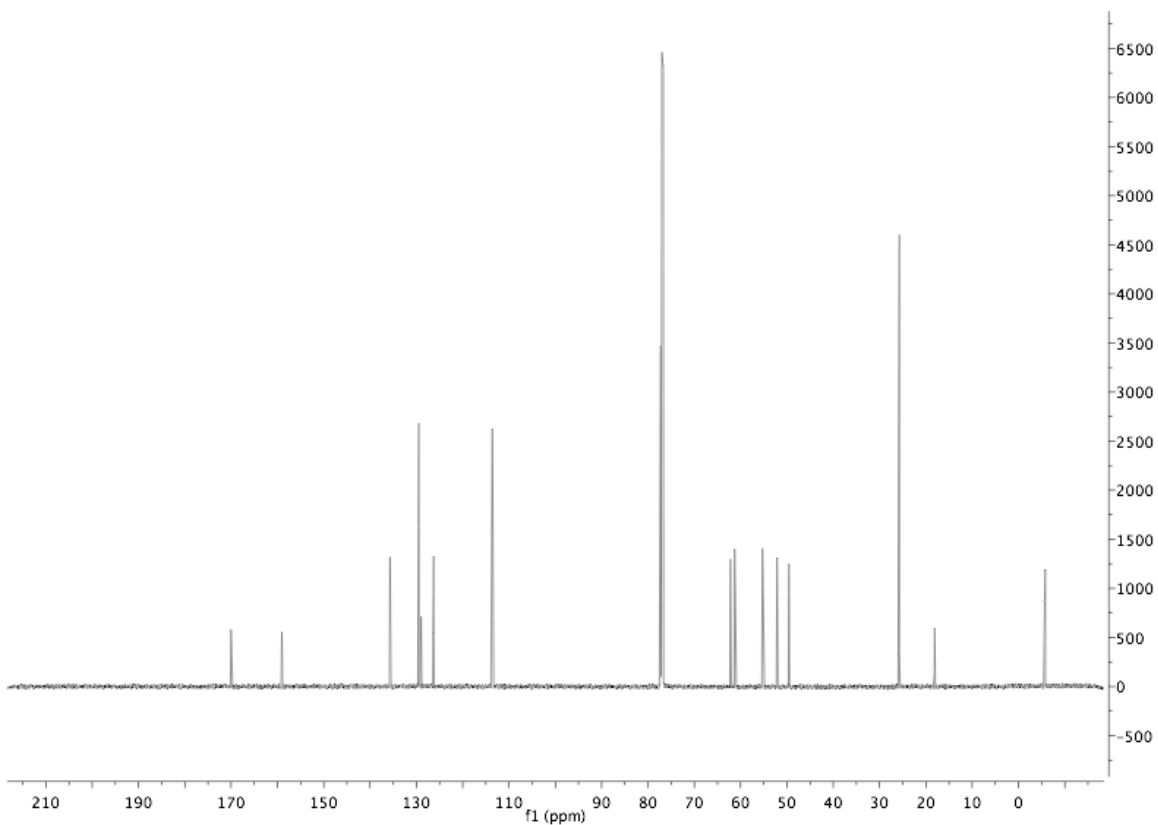

Methyl 2-(*N*-benzylvinylsulfonamido)-3-((*tert*-butyl-dimethylsilyl)oxy)propanoate (**3c**)

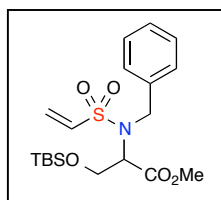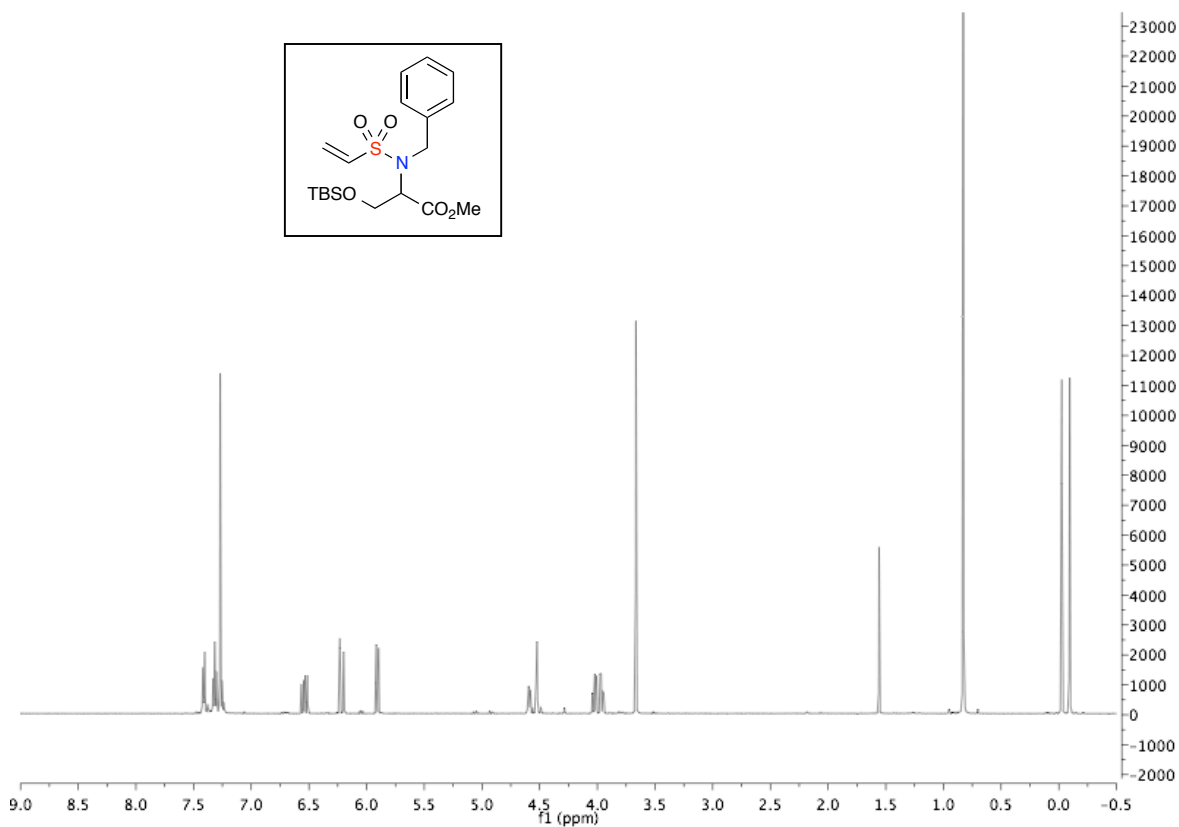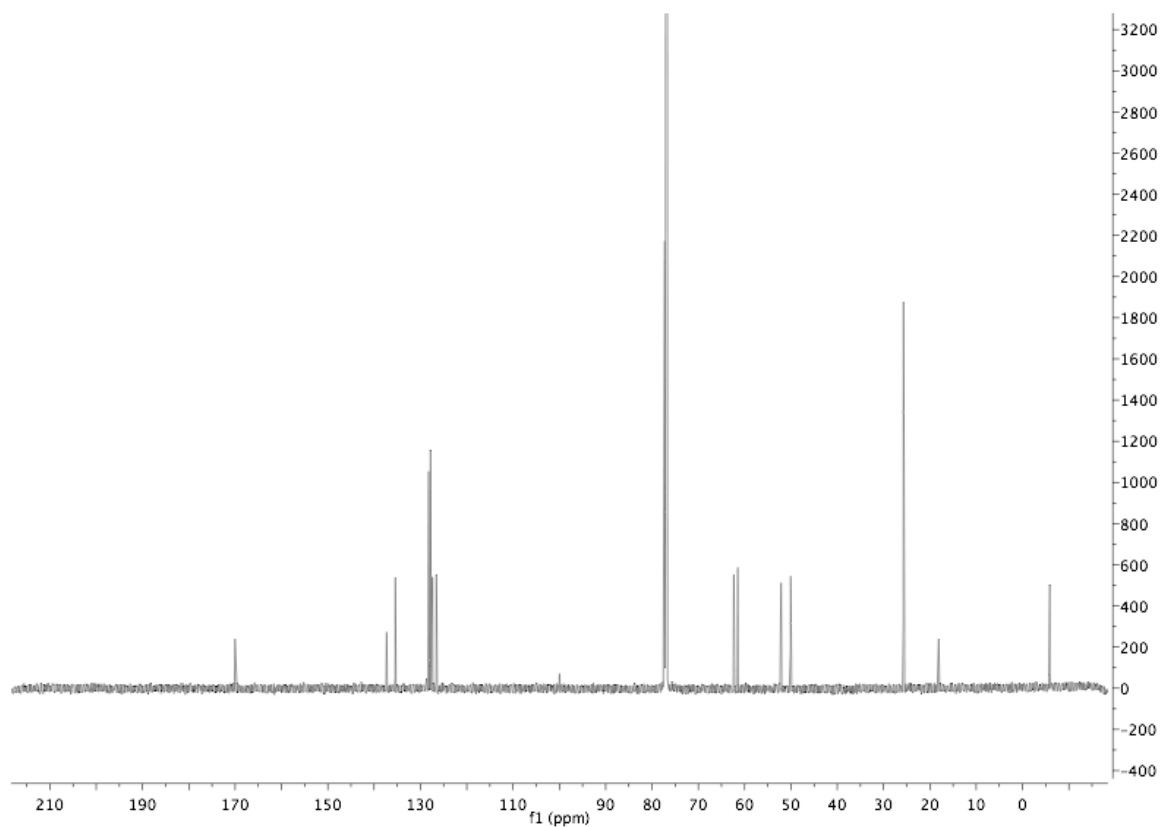



Methyl 3-((*tert*-butyldimethylsilyl)oxy)-2-(*N*-(4-chlorobenzyl)vinylsulfonamido)propanoate (**3d**)

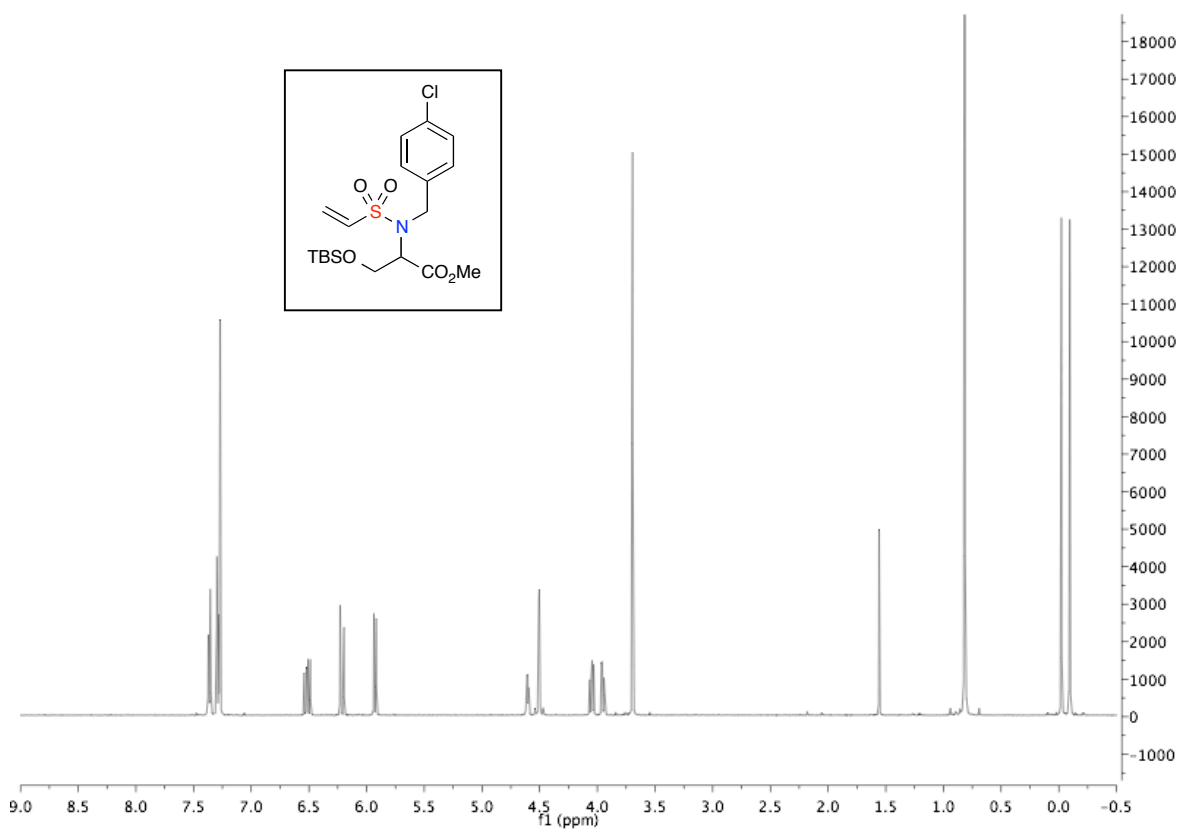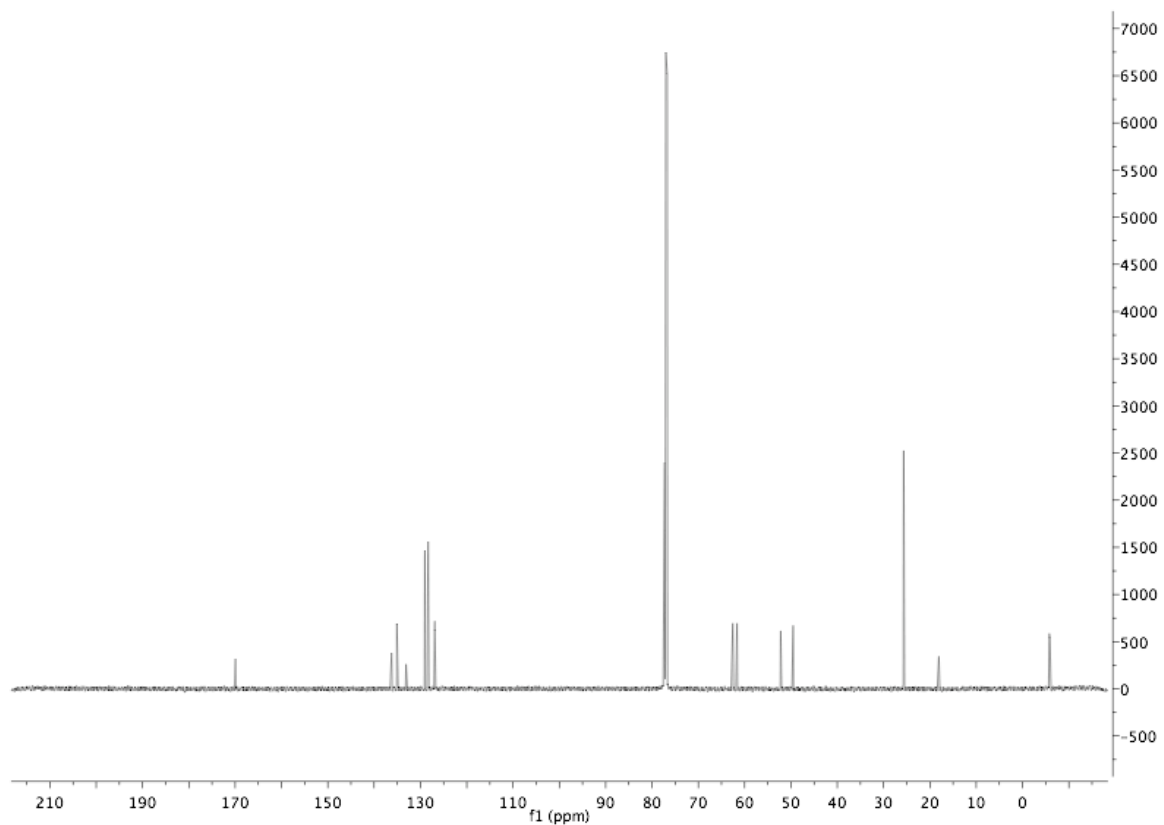

Methyl 3-((*tert*-butyldimethylsilyl)oxy)-2-(*N*-(4-fluorobenzyl)vinylsulfonamido)propanoate (**3e**)

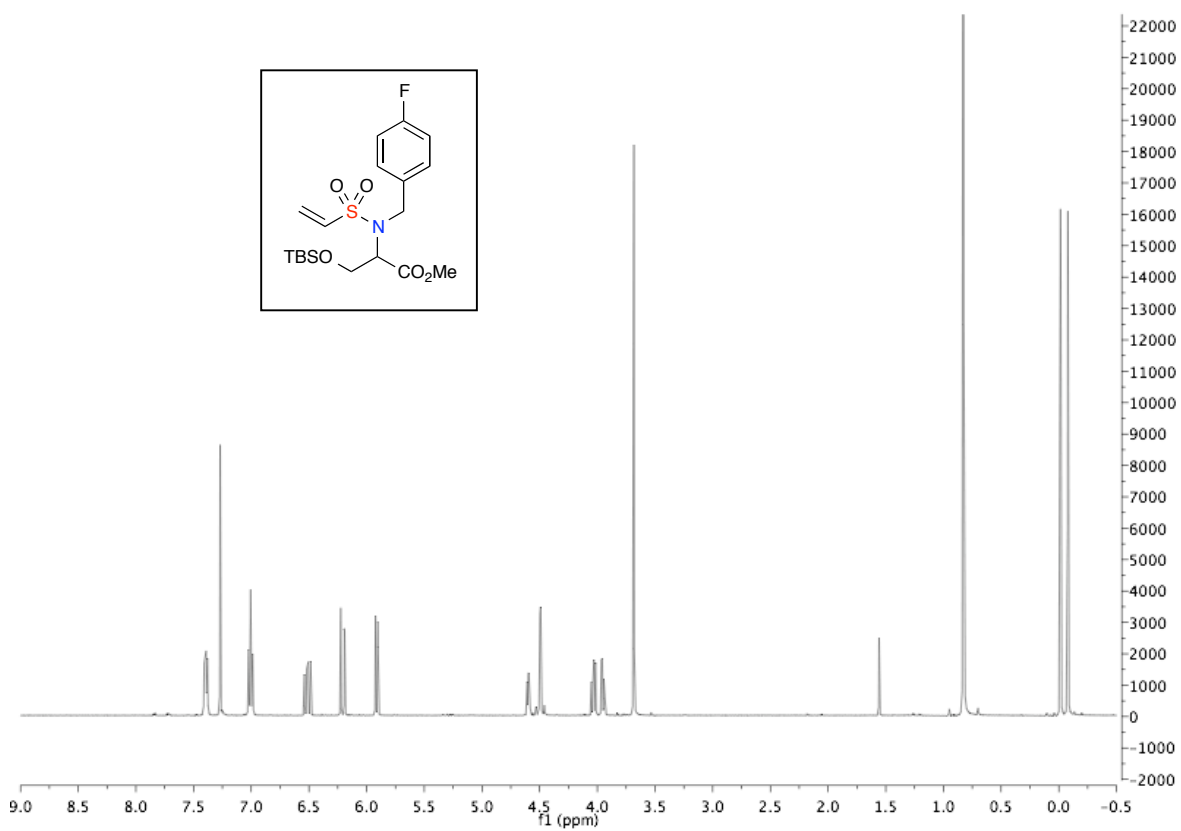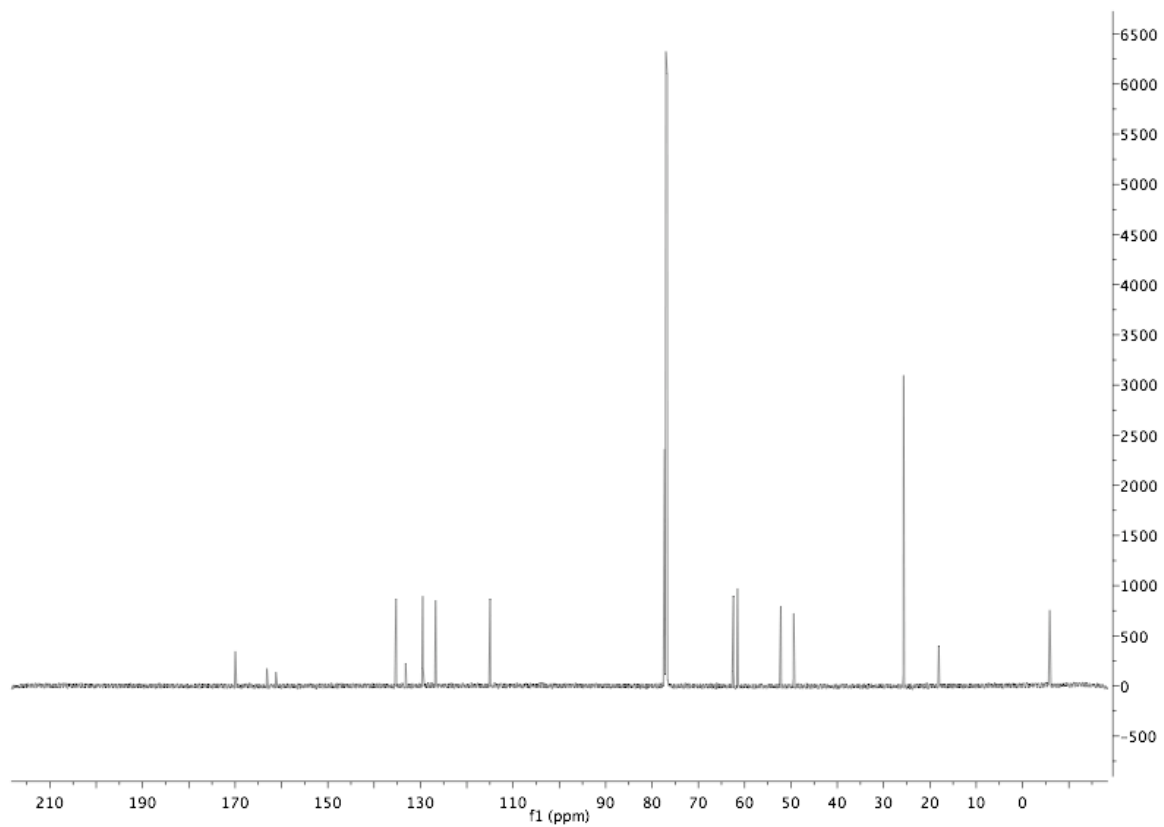

Methyl 3-((*tert*-butyldimethylsilyl)oxy)-2-(*N*-(4-(trifluoromethyl)benzyl)vinylsulfonamido)propanoate (**3f**)

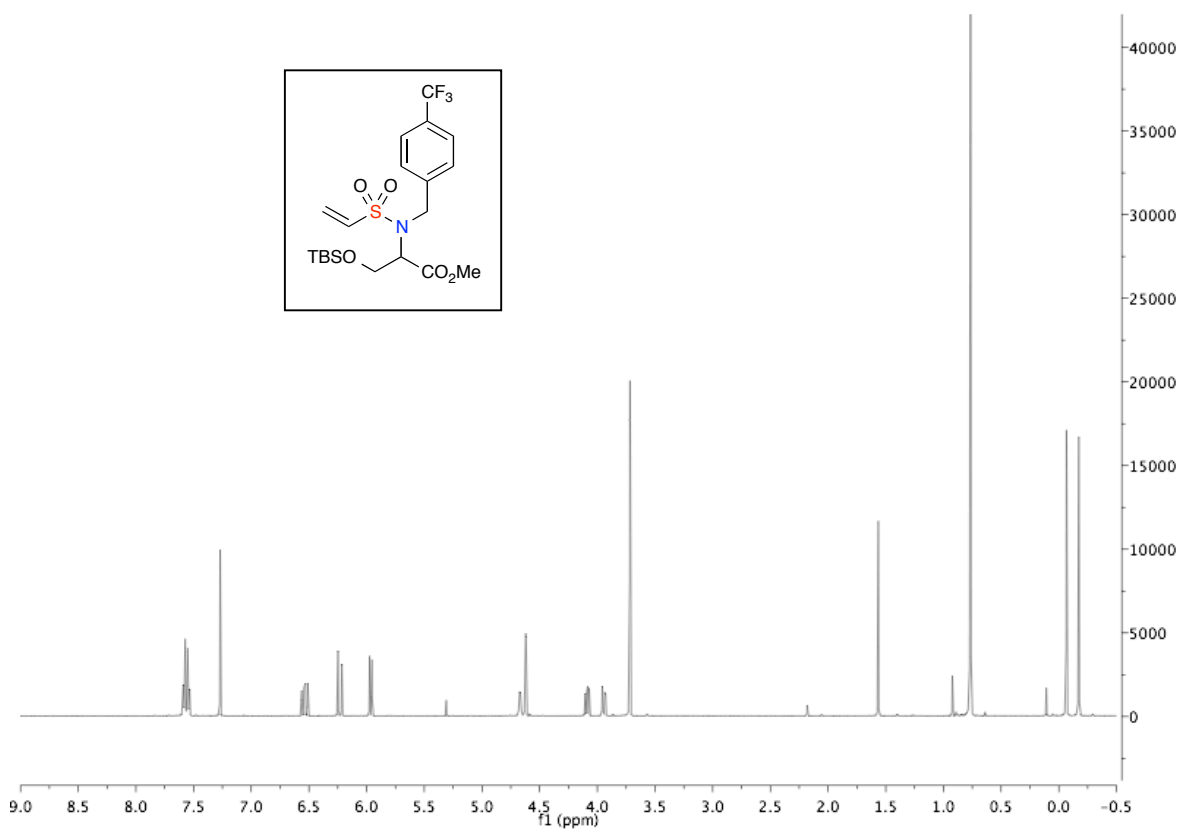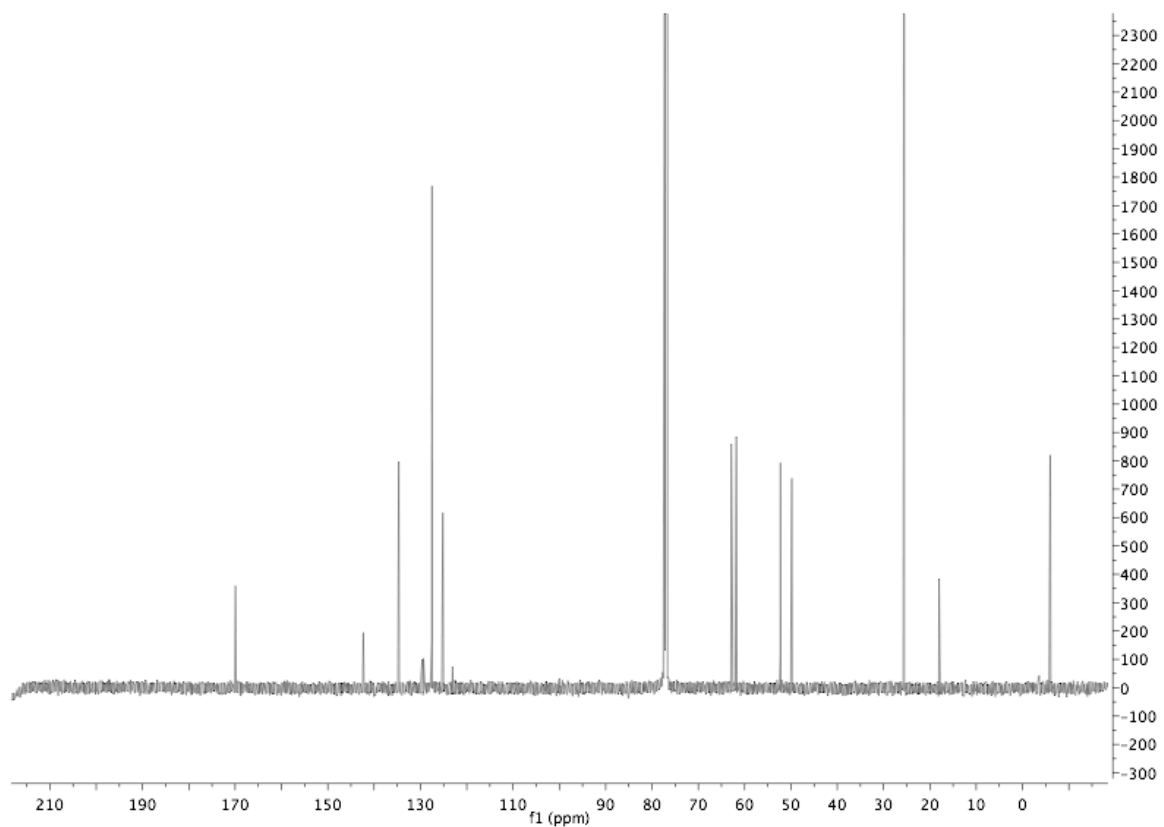

Methyl 2-(*N*-(4-methylbenzyl)vinylsulfonamido)acrylate (**4**):

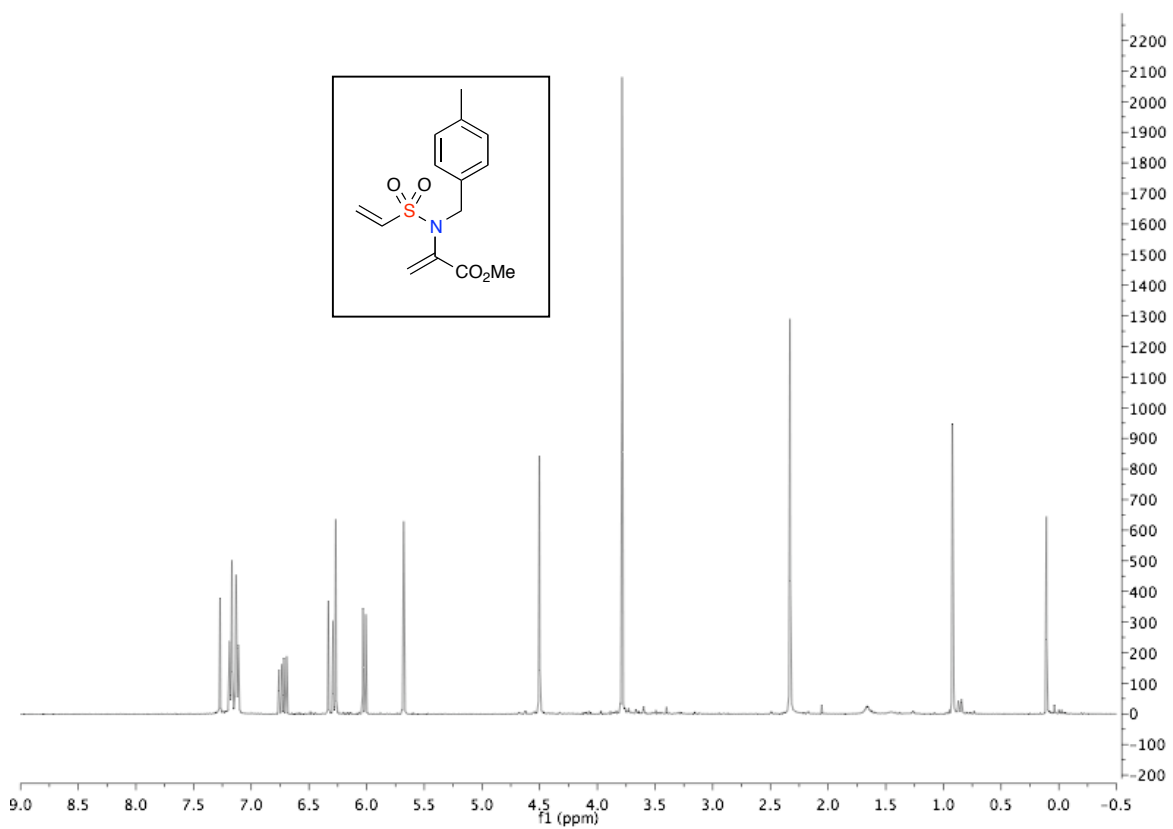

Methyl 5-cyclopentyl-2-(4-methylbenzyl)-1,2,5-thiadiazepane-3-carboxylate 1,1-dioxide (**5a**)

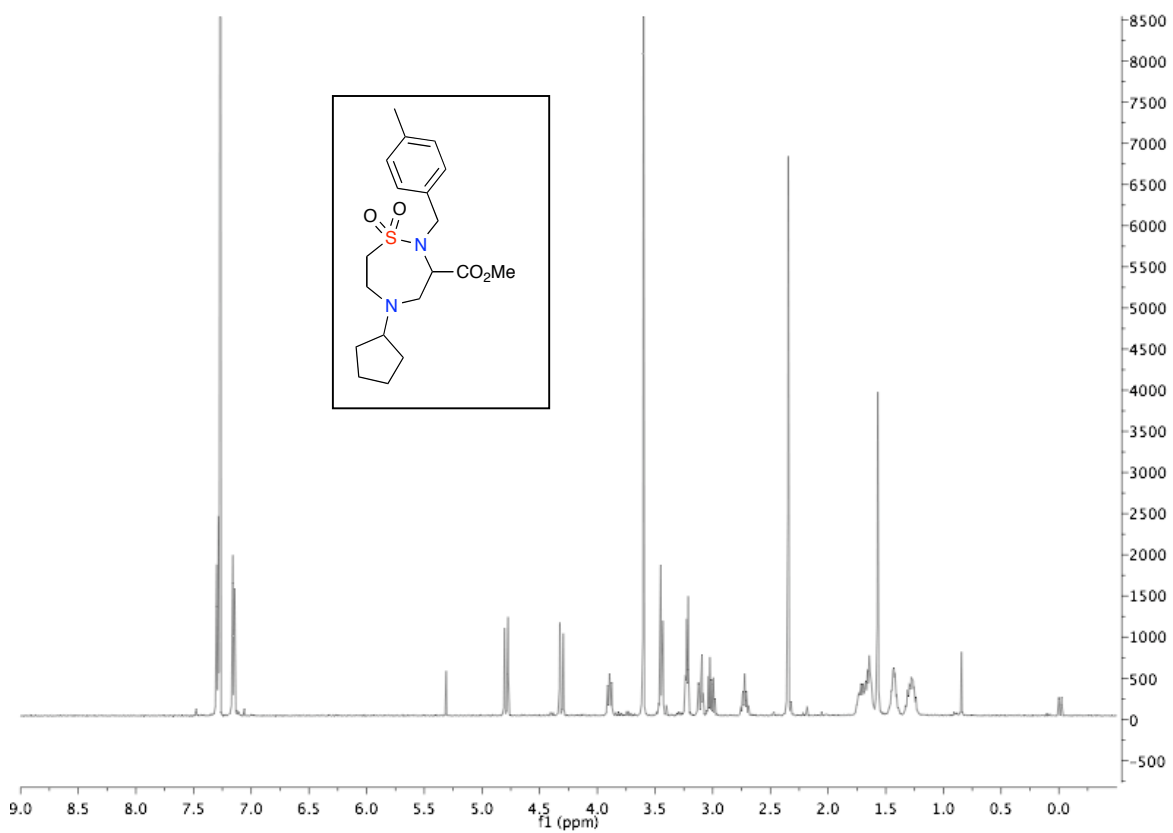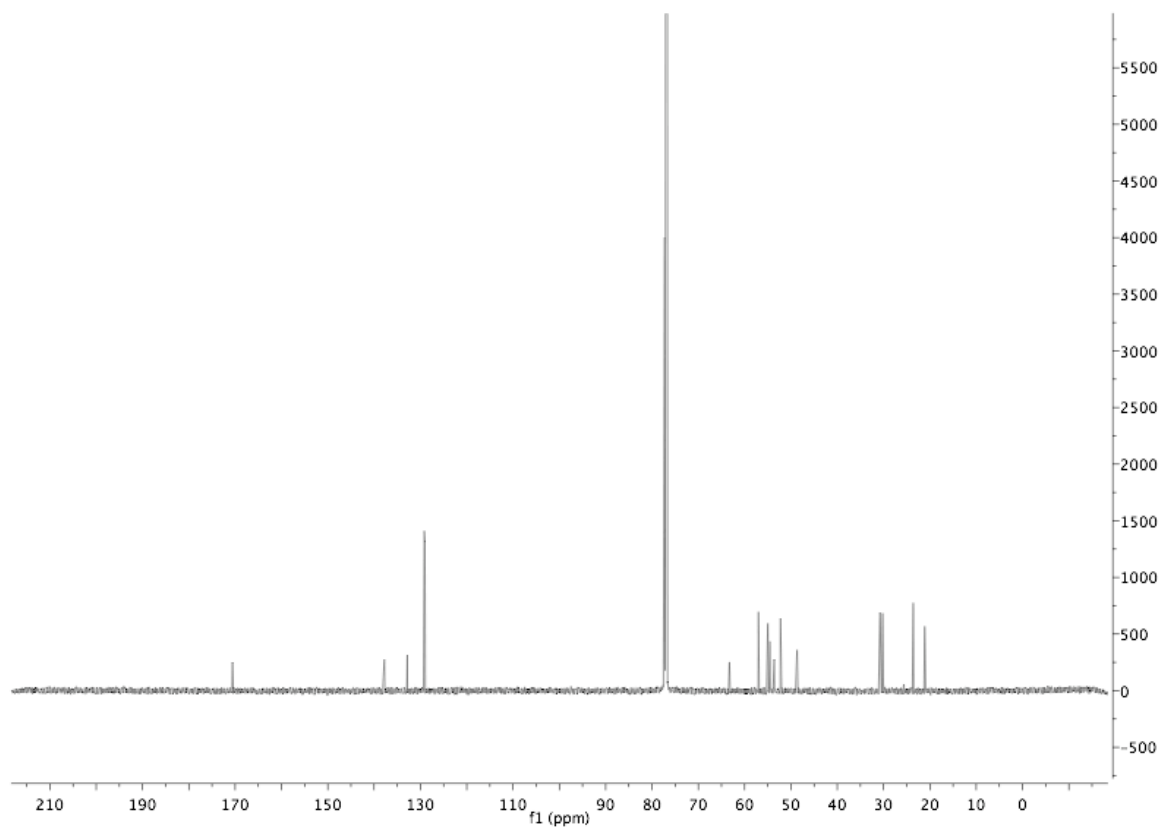

Methyl 2-(4-methoxybenzyl)-5-octyl-1,2,5-thiadiazepane-3-carboxylate 1,1-dioxide (**5b**)

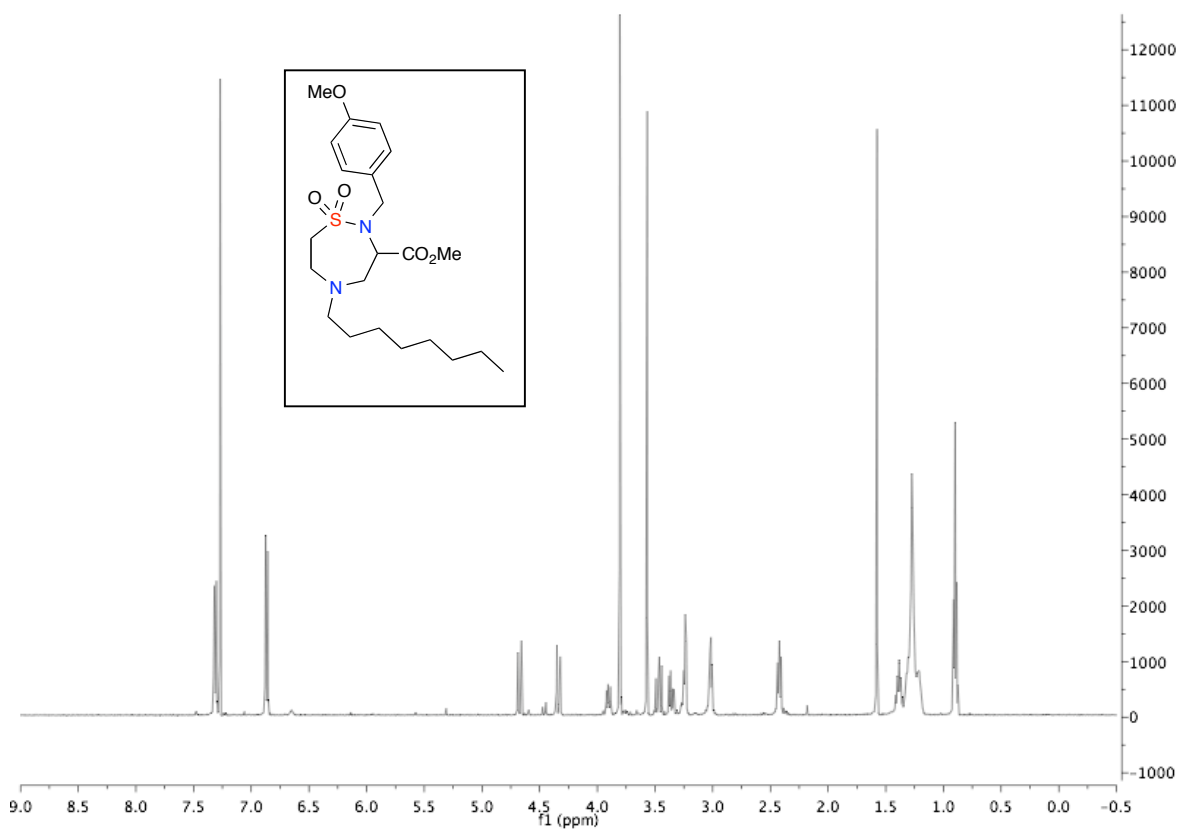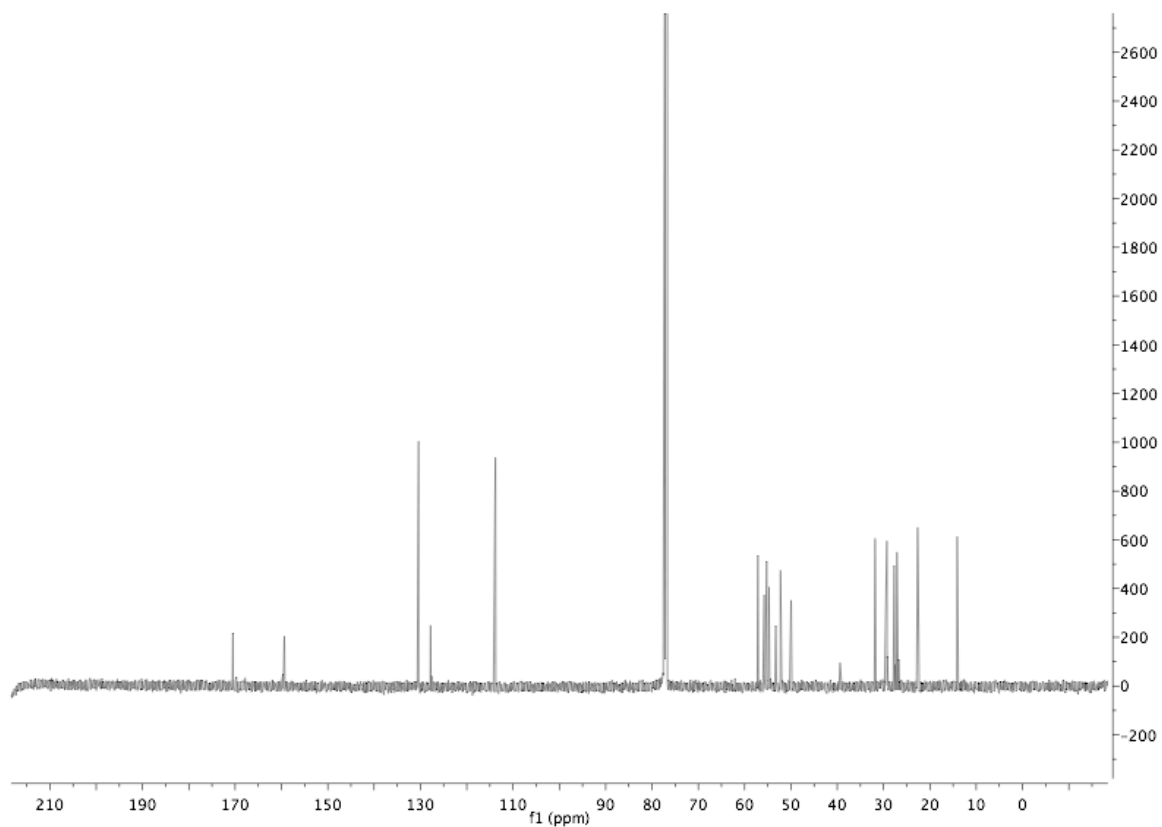

Methyl 2-benzyl-5-butyl-1,2,5-thiadiazepane-3-carboxylate 1,1-dioxide (**5c**)

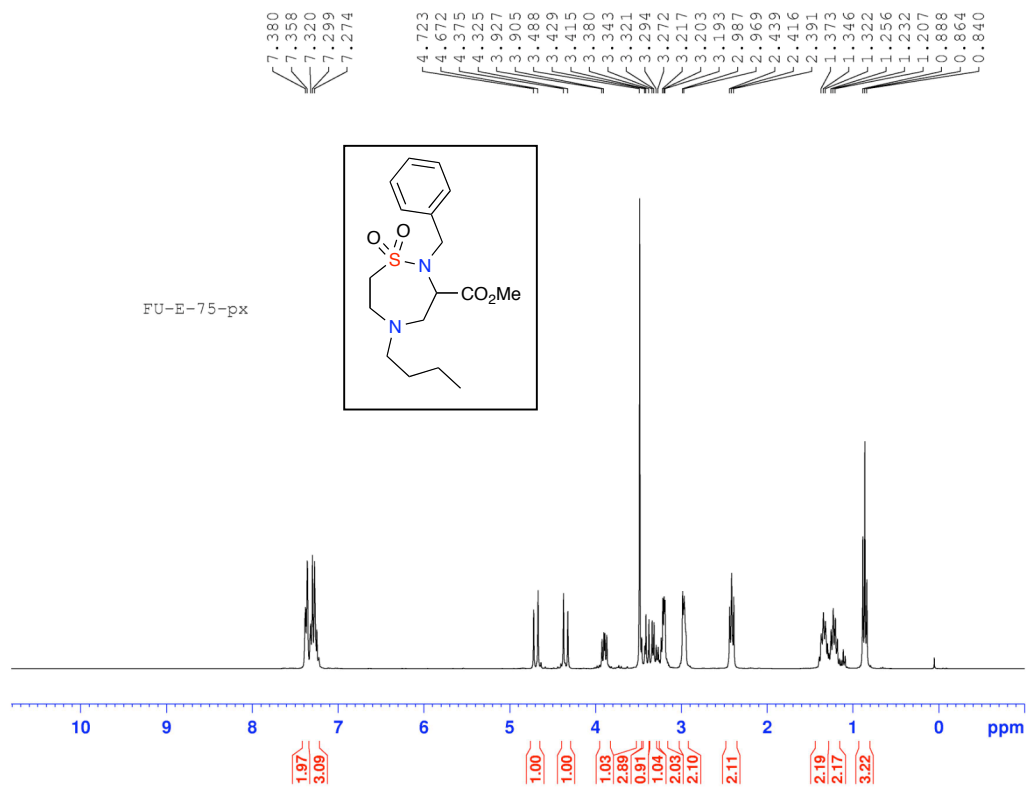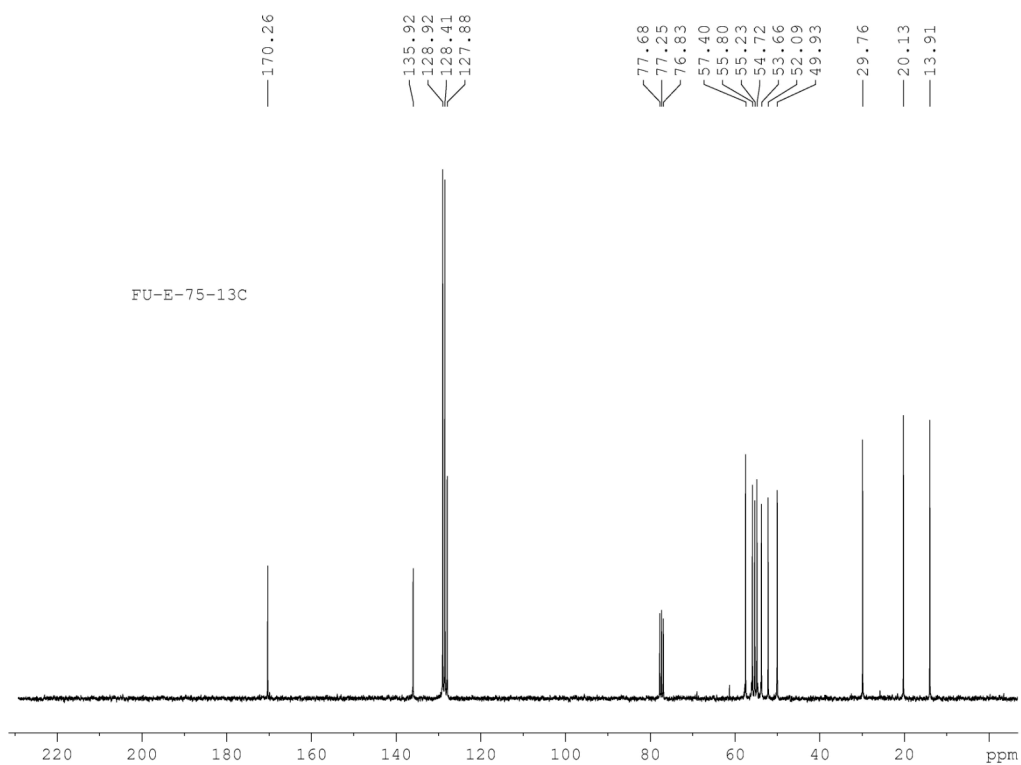

Methyl 2-benzyl-5-(4-fluorobenzyl)-1,2,5-thiadiazepane-3-carboxylate 1,1-dioxide (**5d**)

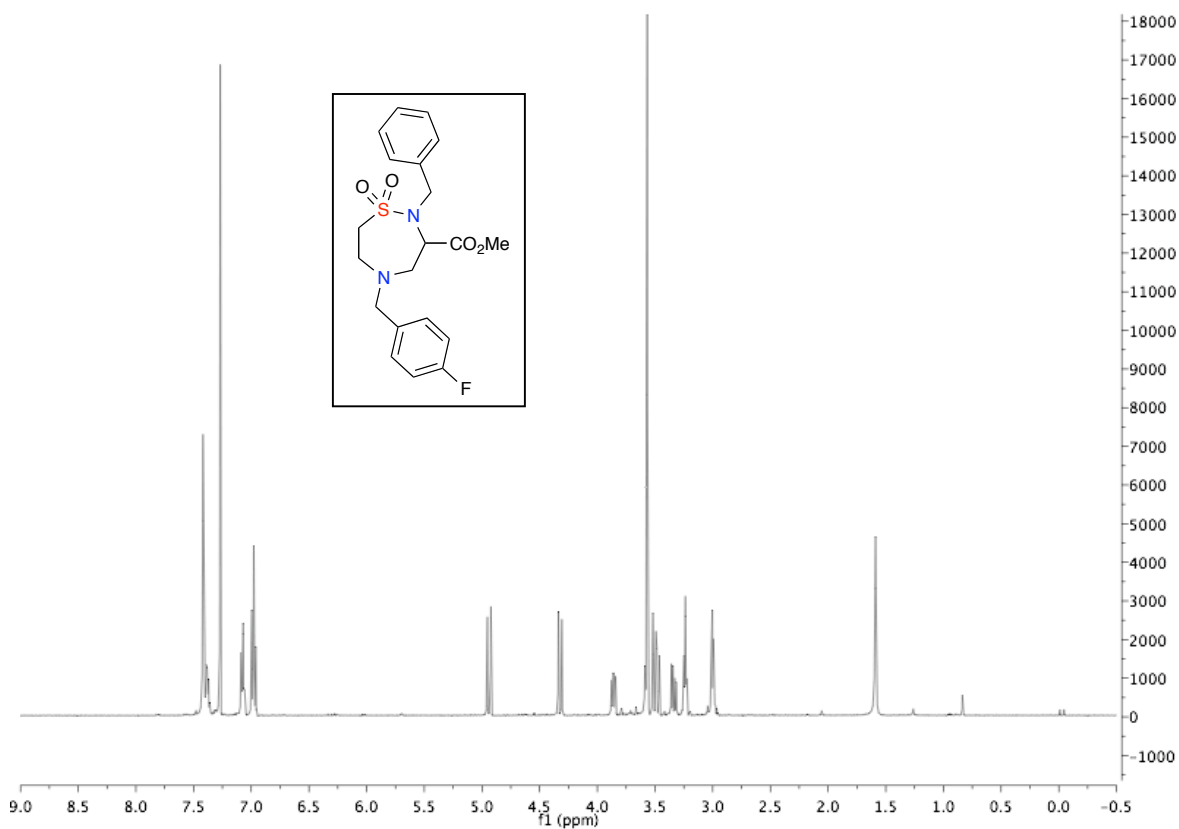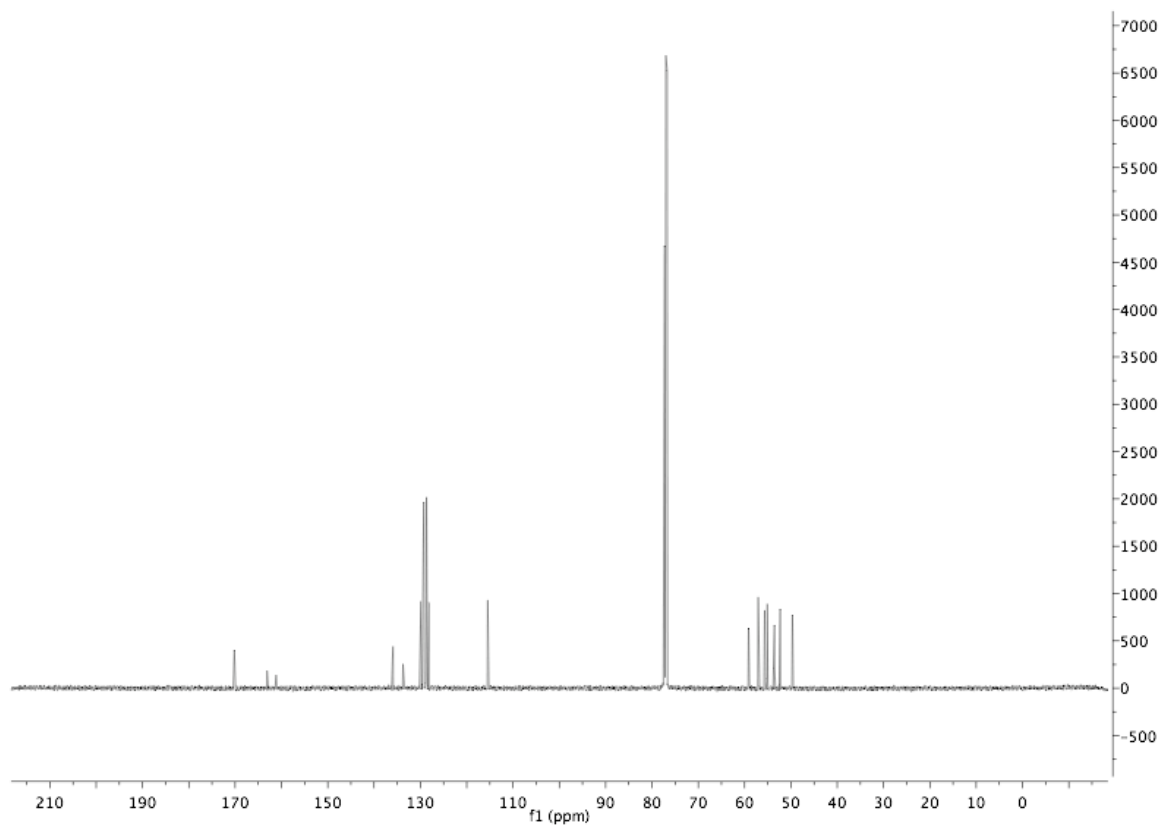



Methyl 2-(4-chlorobenzyl)-5-(4-methoxybenzyl)-1,2,5-thiadiazepane-3-carboxylate 1,1-dioxide (**5e**)

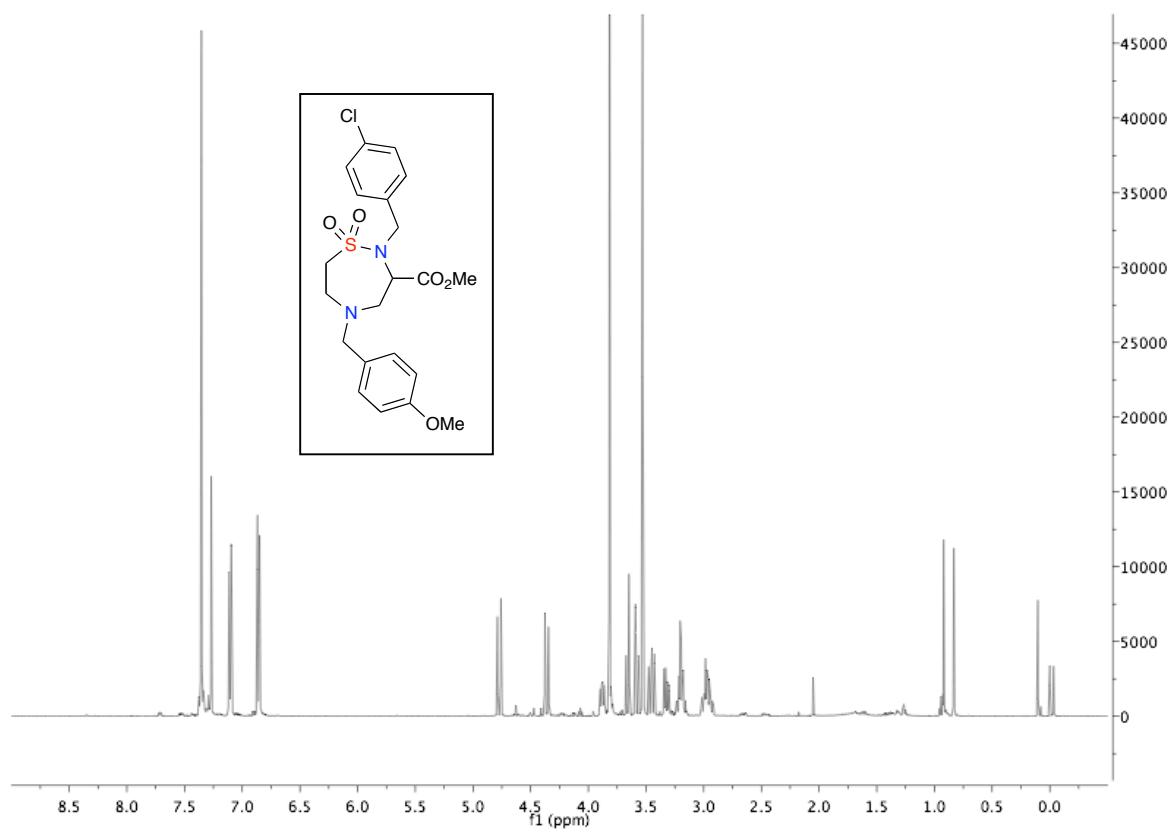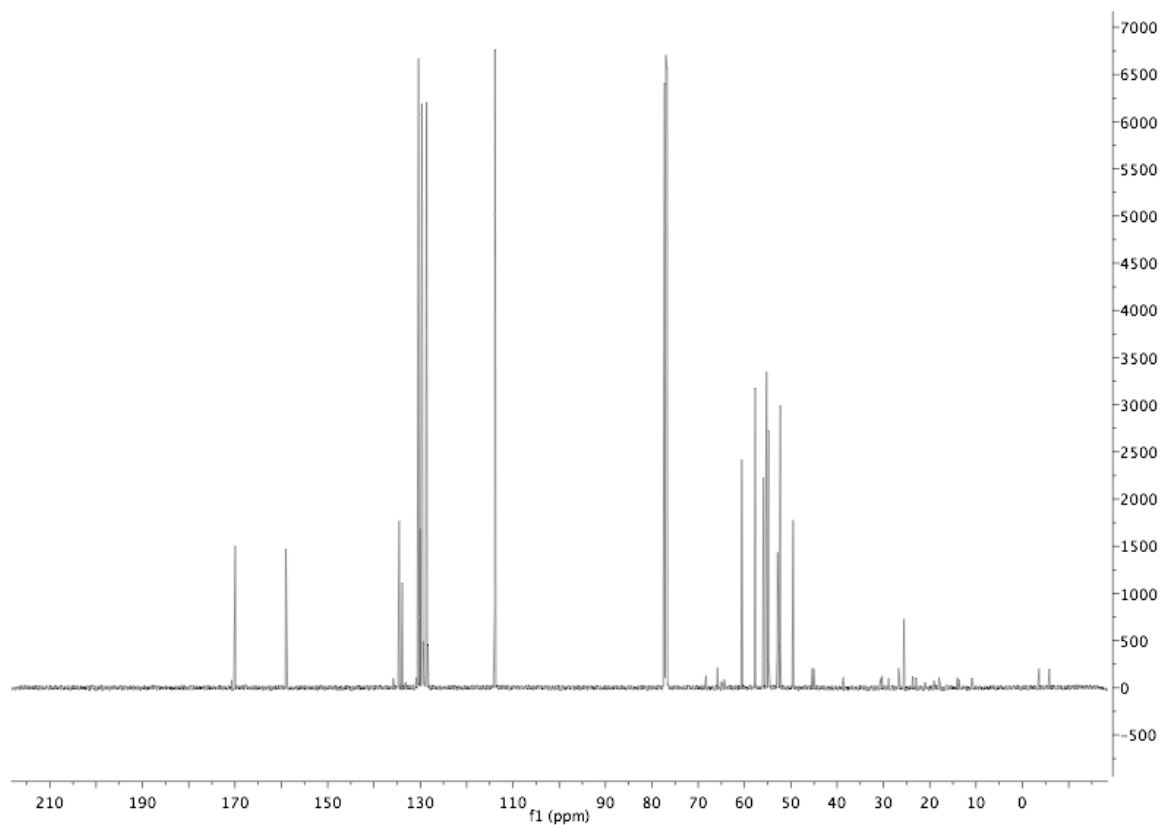

Methyl 2-(4-chlorobenzyl)-5-phenethyl-1,2,5-thiadiazepane-3-carboxylate 1,1-dioxide (**5f**)

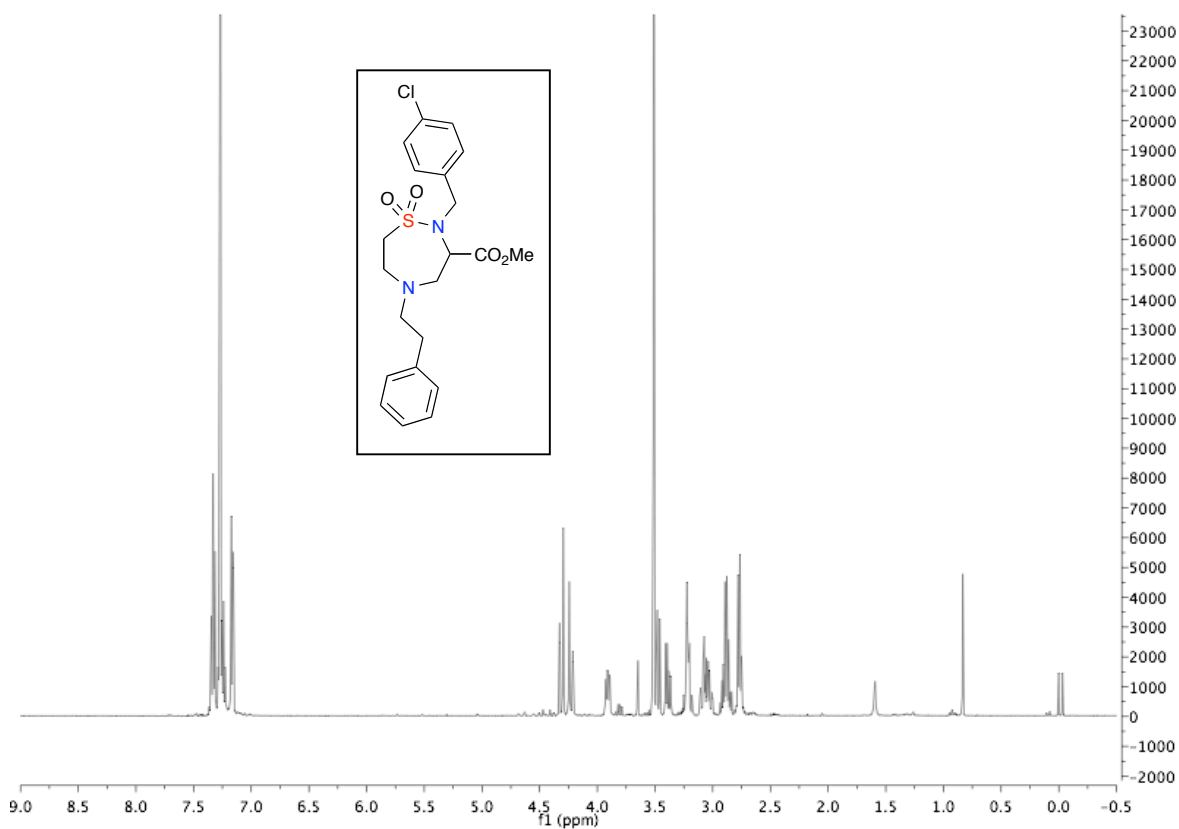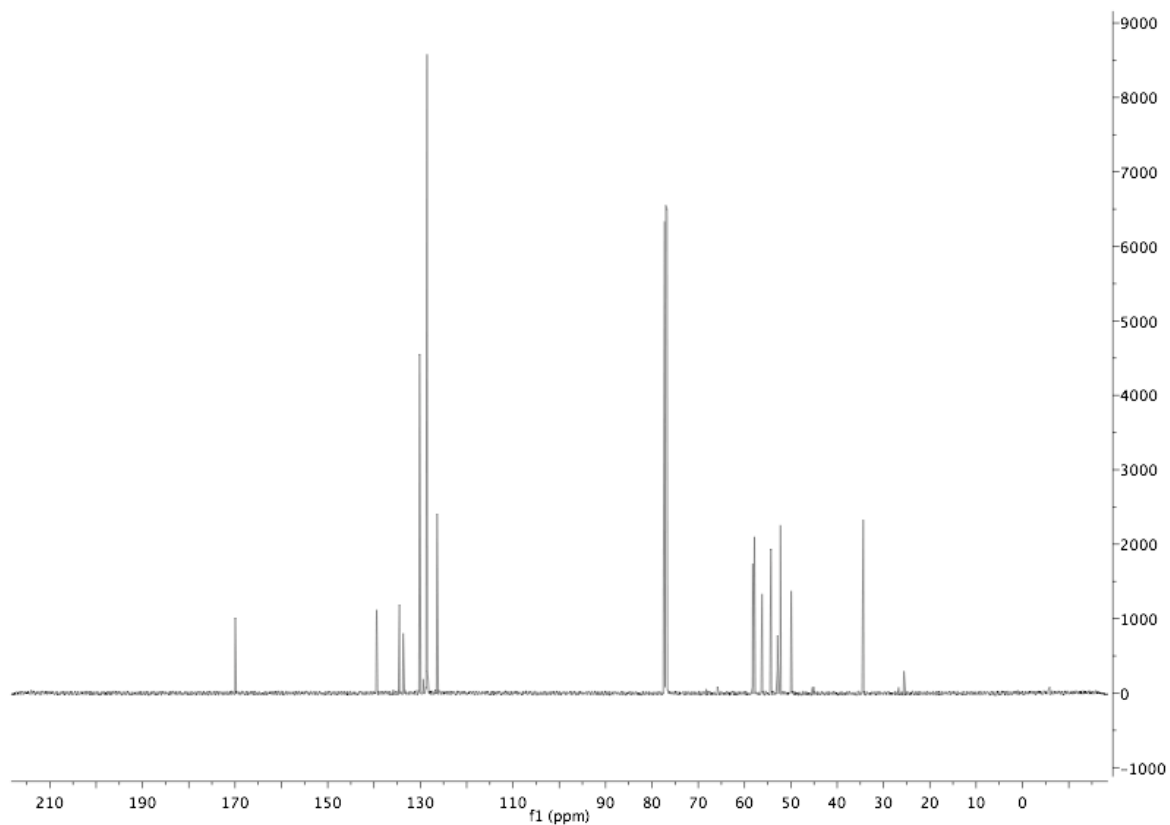

Methyl 2-(4-fluorobenzyl)-5-isobutyl-1,2,5-thiadiazepane-3-carboxylate 1,1-dioxide (**5g**)

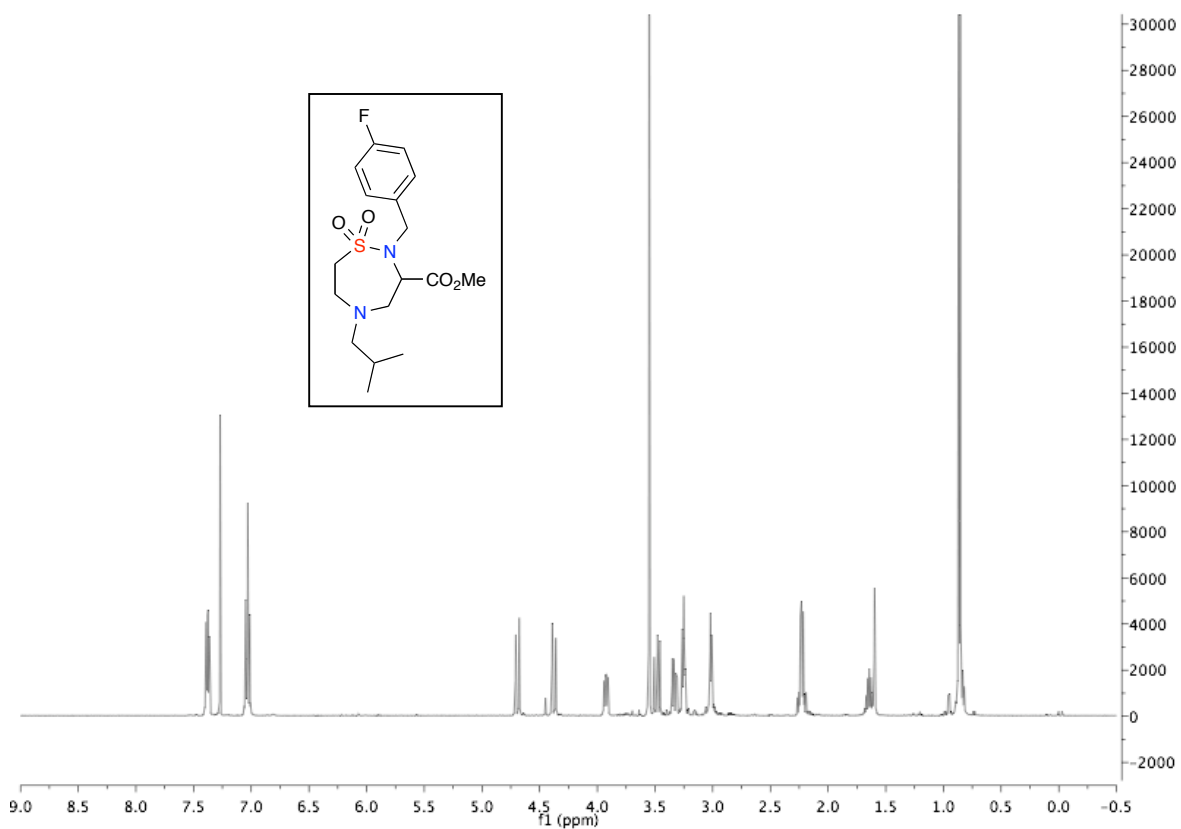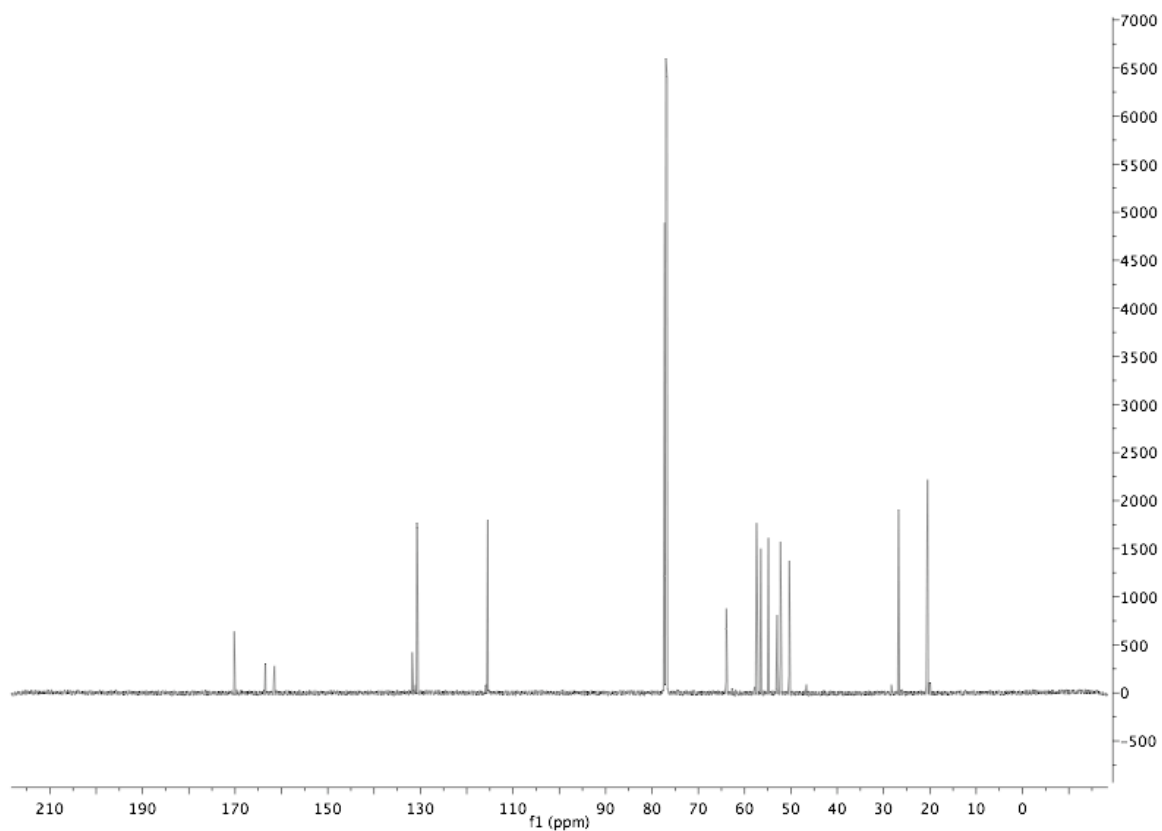

Methyl 5-benzyl-2-(4-(trifluoromethyl)benzyl)-1,2,5-thiadiazepane-3-carboxylate 1,1-dioxide (**5h**)

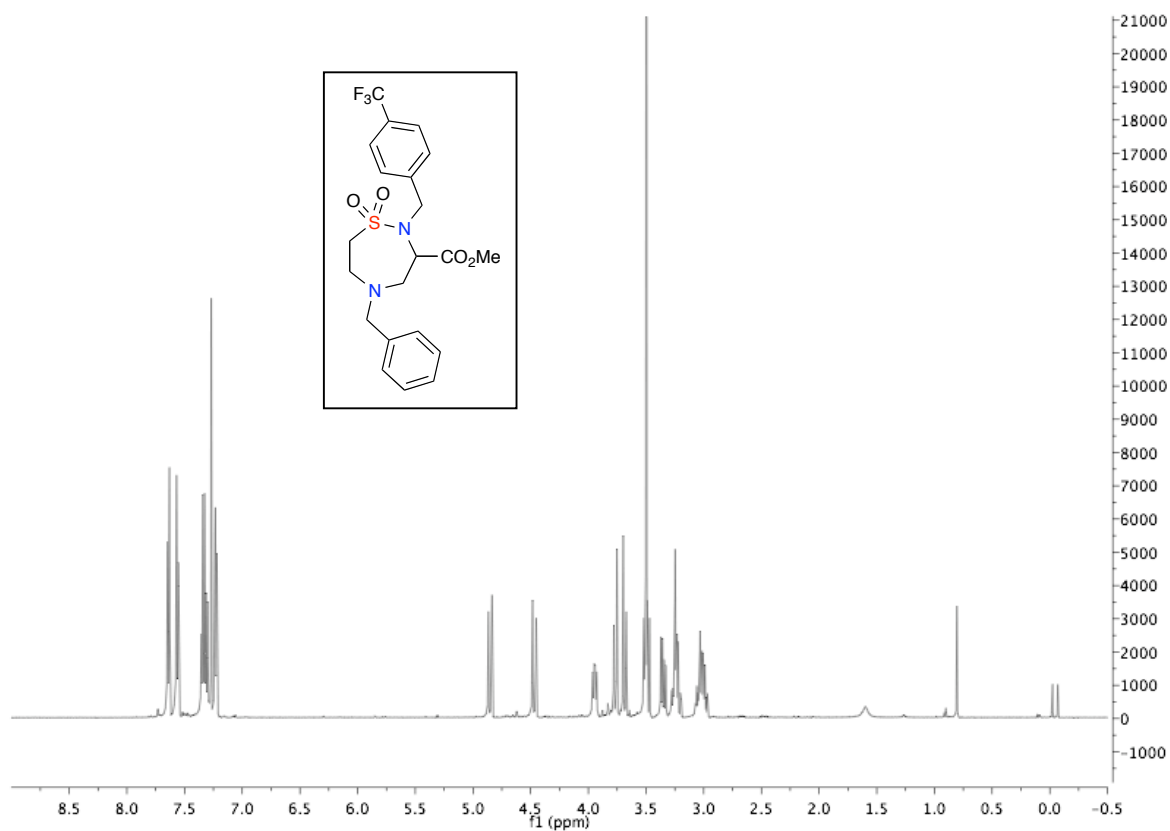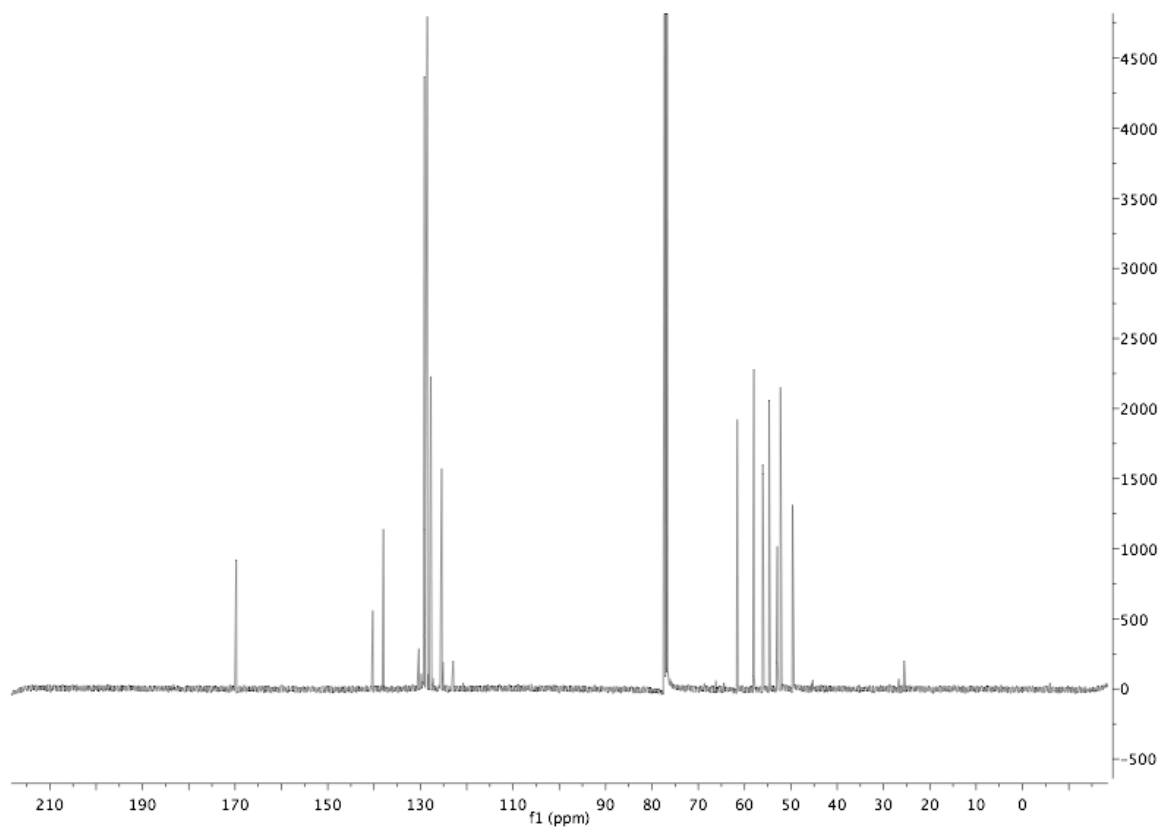

Methyl 3-((*tert*-butyldimethylsilyl)oxy)-2-(*N*-(prop-2-yn-1-yl)vinylsulfonamido)propanoate (**6**)

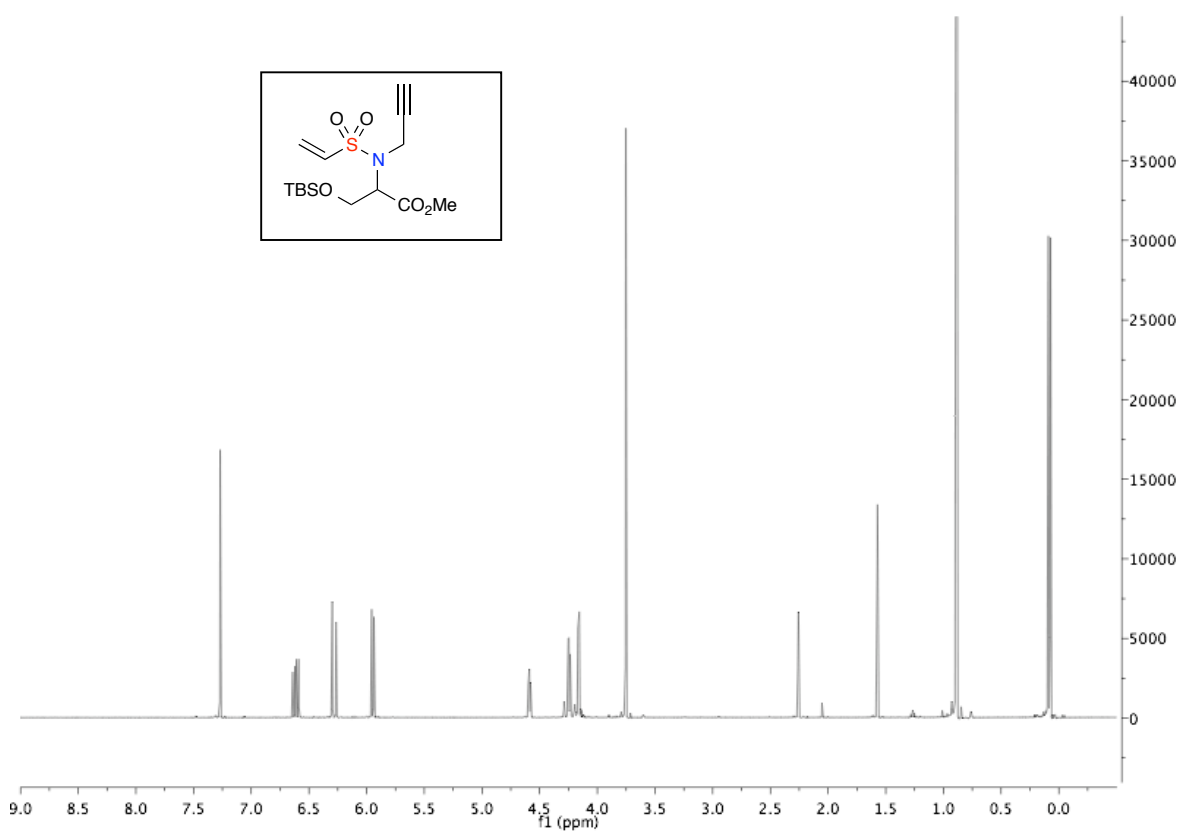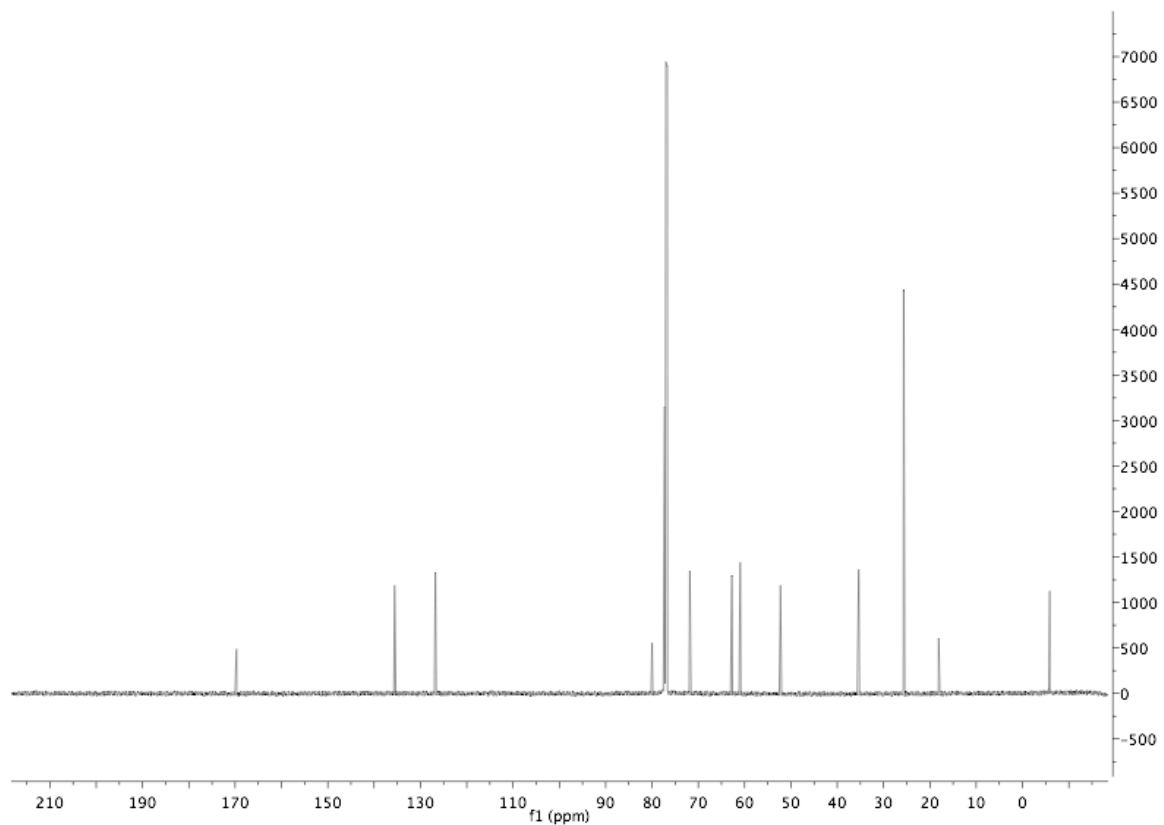

Methyl 5-butyl-2-((1-(4-methylbenzyl)-1H-1,2,3-triazol-4-yl)methyl)-1,2,5-thiadiazepane-3-carboxylate 1,1-dioxide (**7a**)

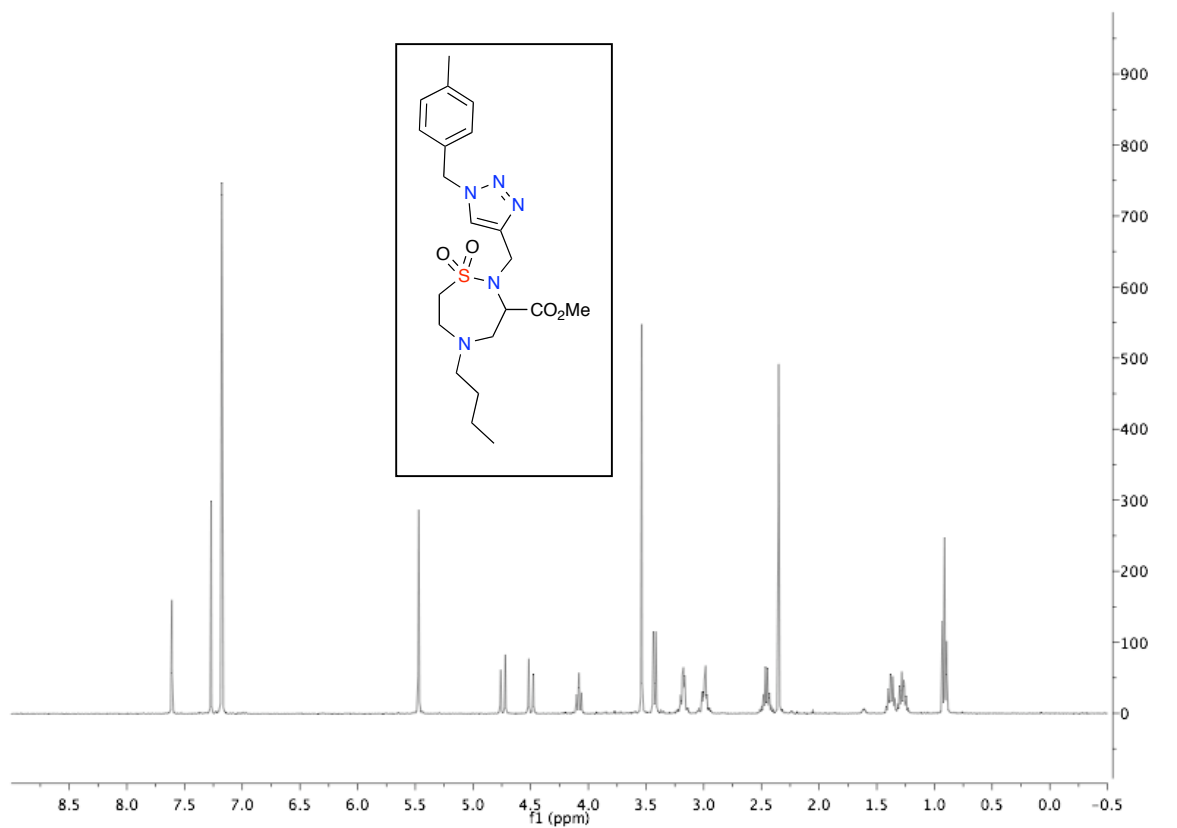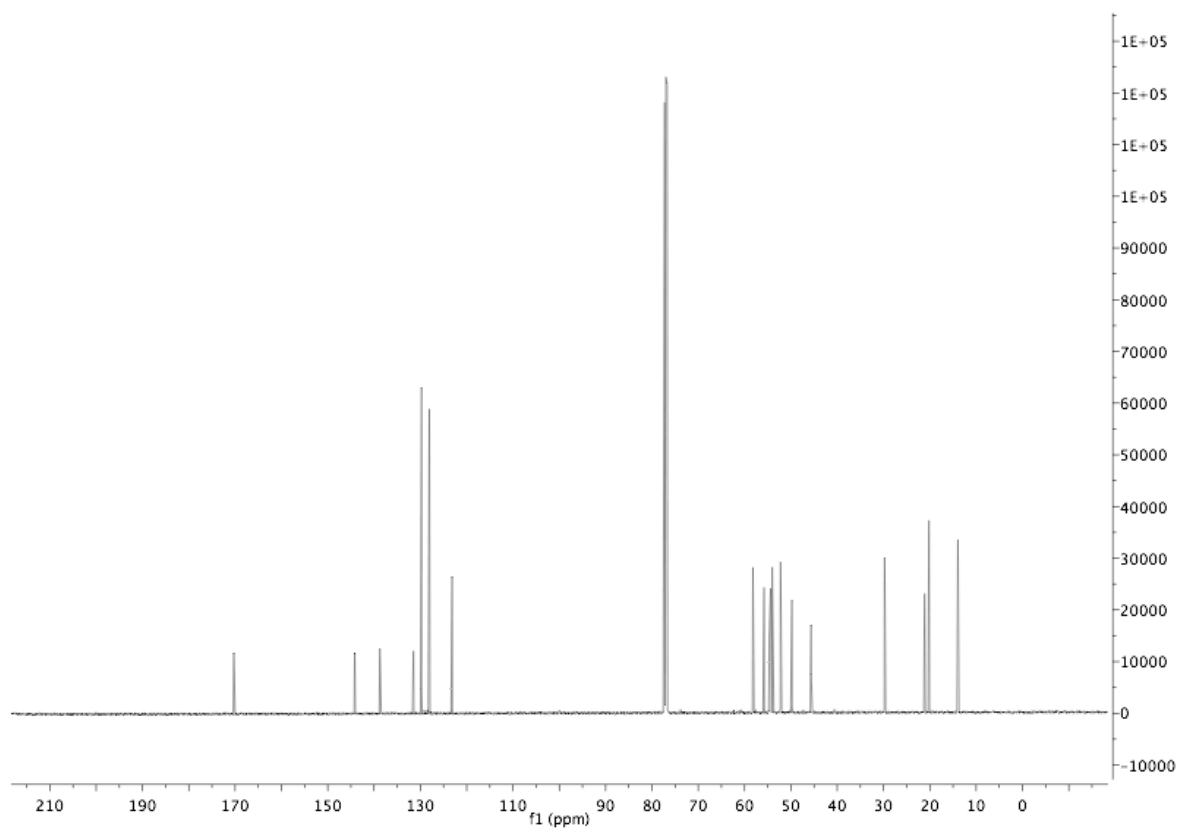

Methyl 5-butyl-2-((1-(3-chlorobenzyl)-1H-1,2,3-triazol-4-yl)methyl)-1,2,5-thiadiazepane-3-carboxylate 1,1-dioxide (**7b**)

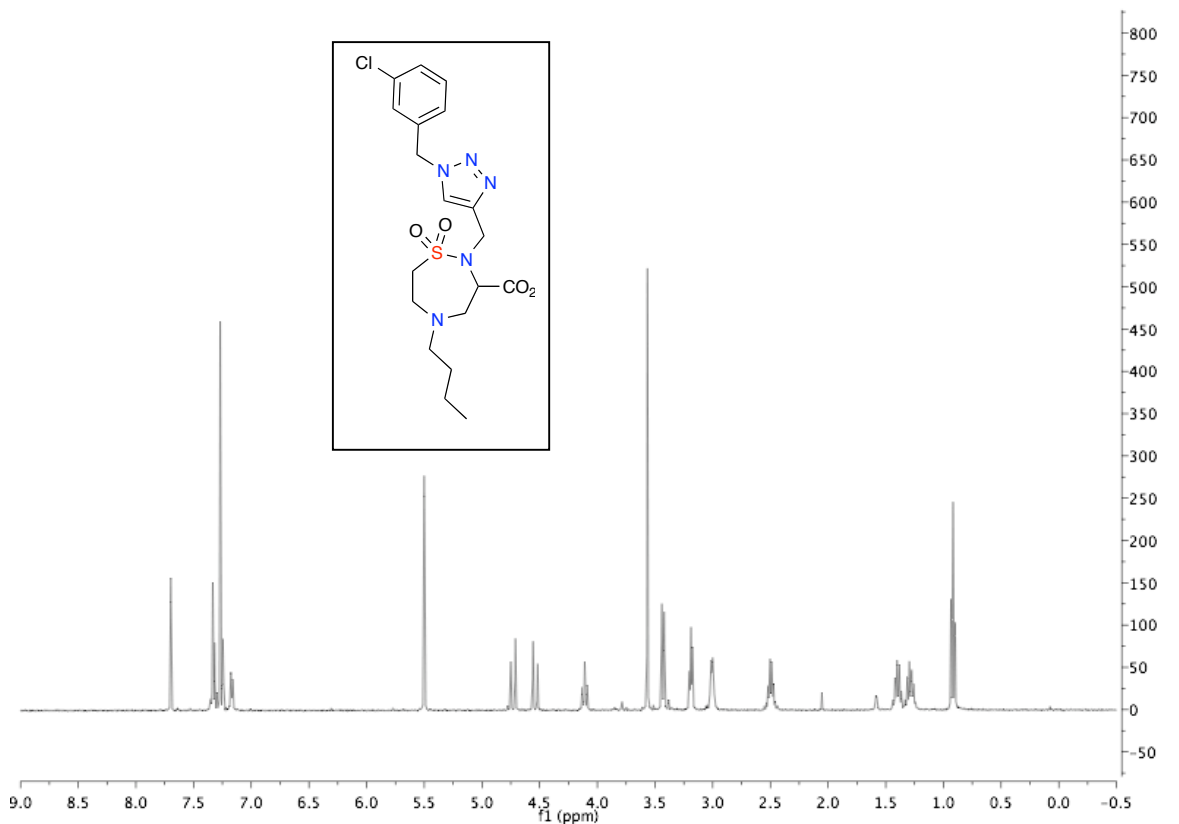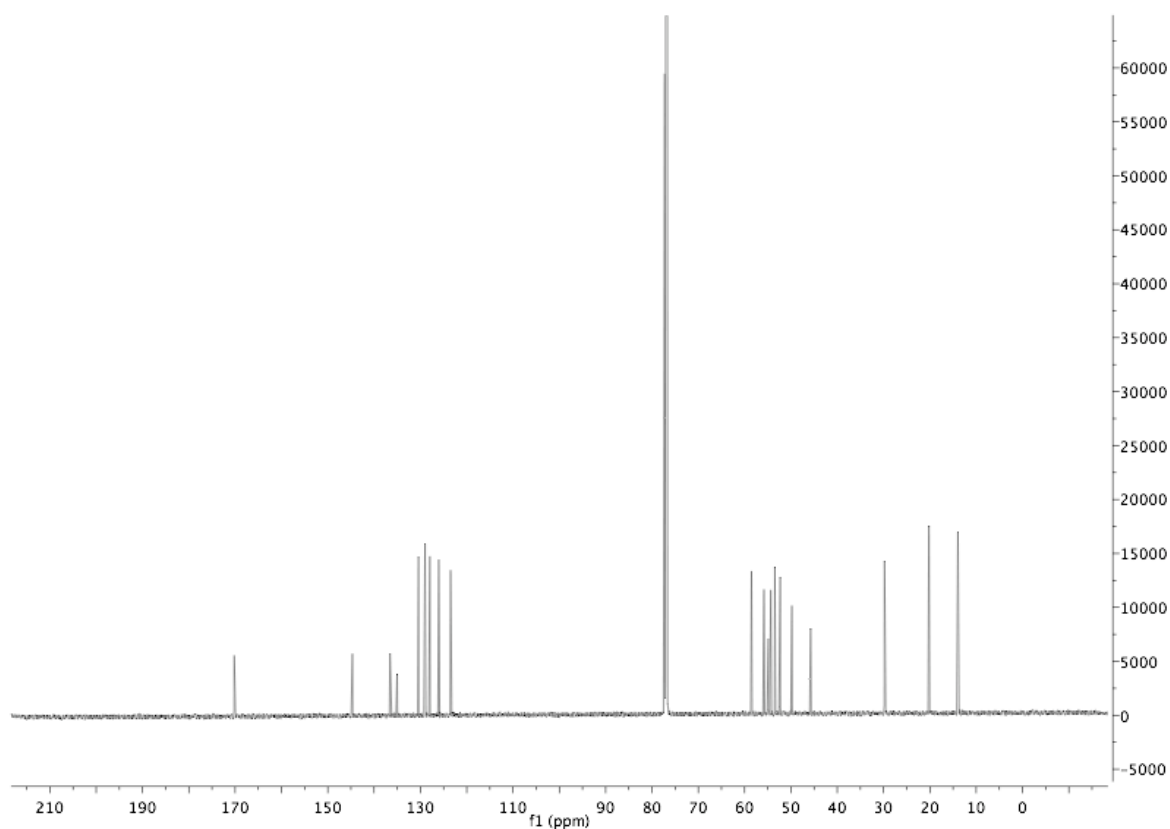

Methyl 2-((1-(2-bromobenzyl)-1*H*-1,2,3-triazol-4-yl)methyl)-5-butyl-1,2,5-thiadiazepane-3-carboxylate 1,1-dioxide (**7c**)

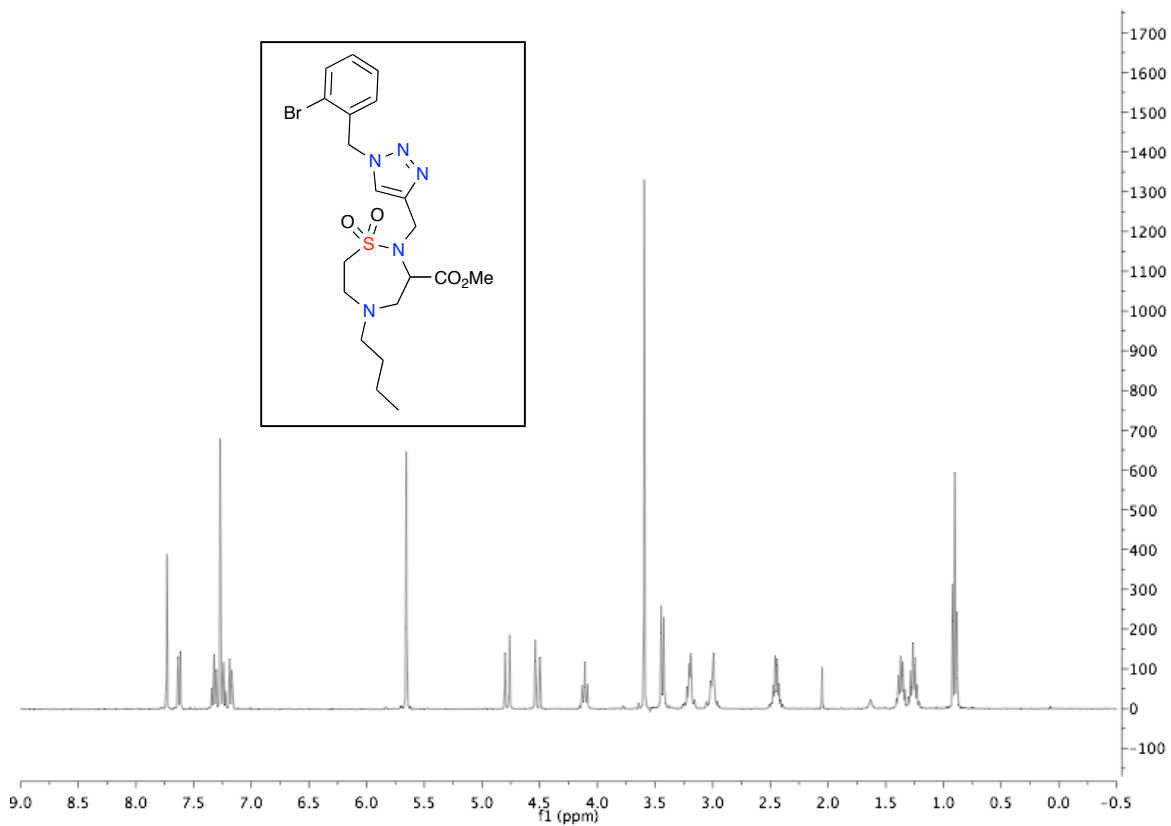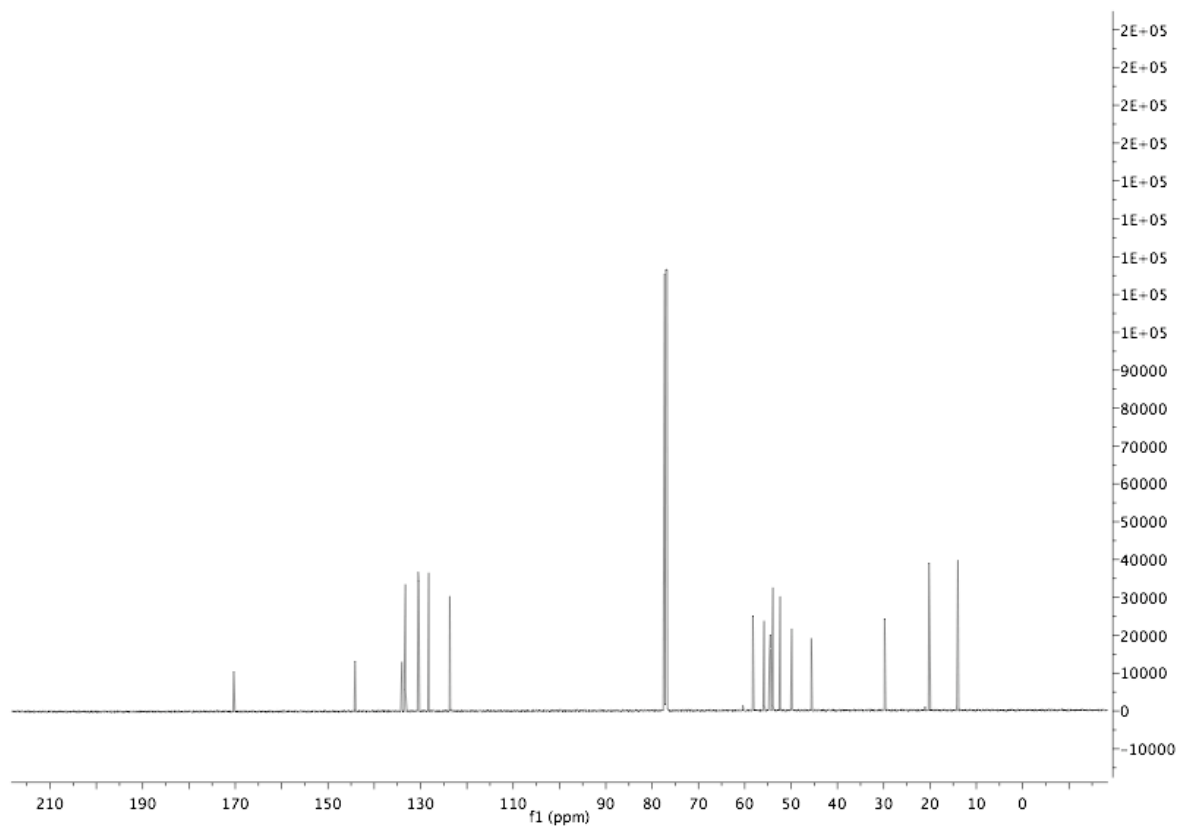



Methyl 5-benzyl-2-((1-(4-methylbenzyl)-1*H*-1,2,3-triazol-4-yl)methyl)-1,2,5-thiadiazepane-3-carboxylate 1,1-dioxide (**7d**)

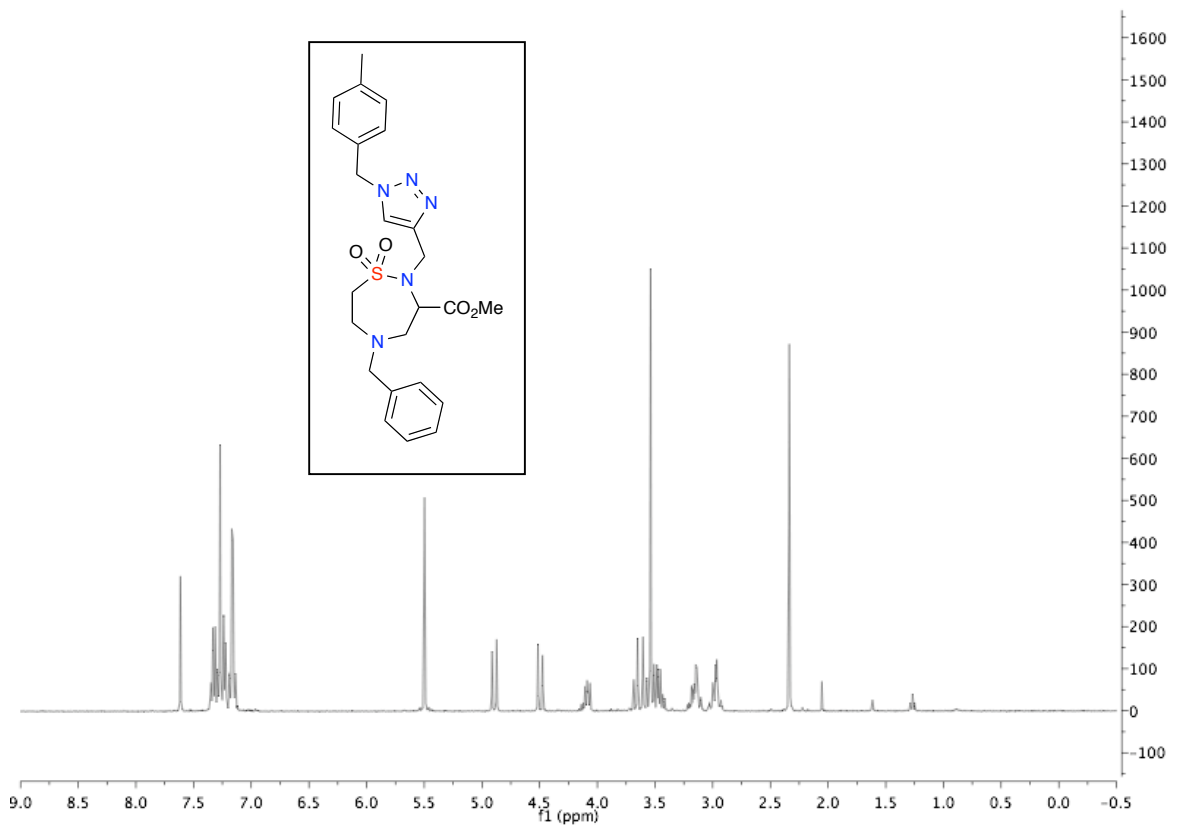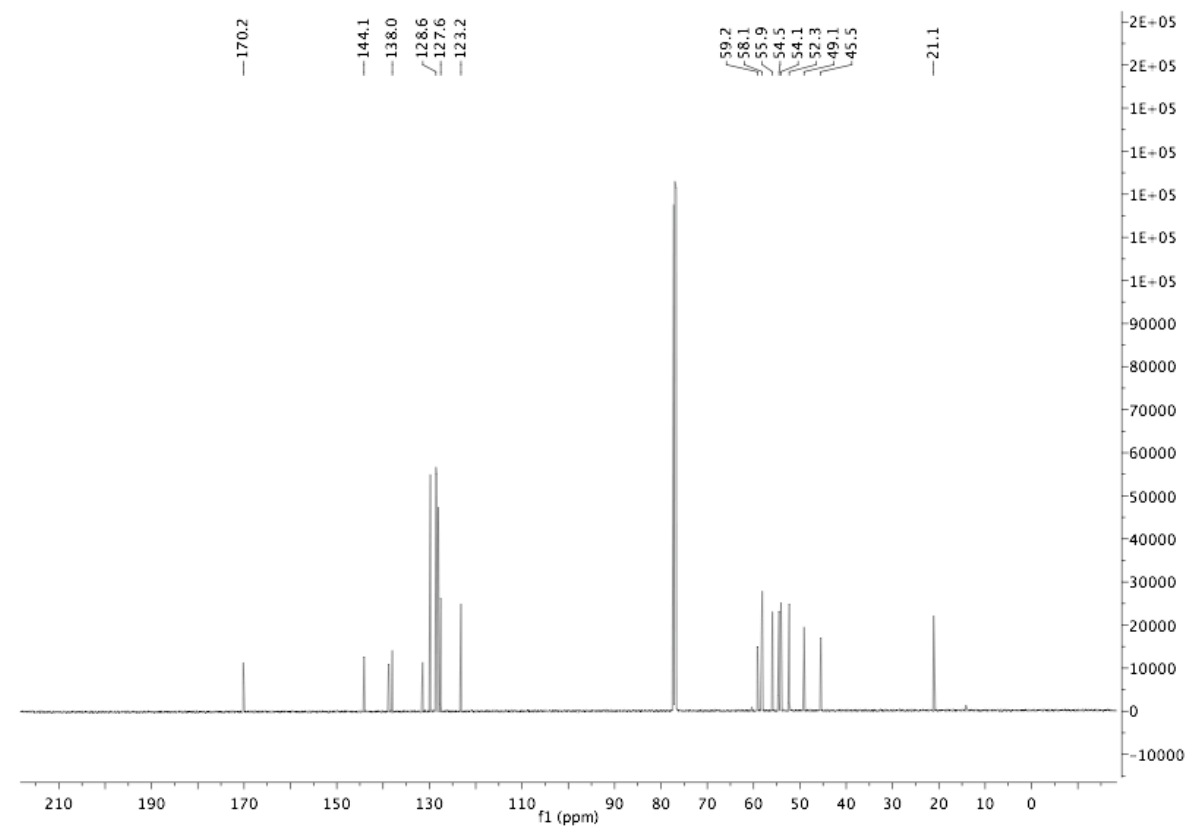

Methyl 5-benzyl-2-((1-(3-chlorobenzyl)-1*H*-1,2,3-triazol-4-yl)methyl)-1,2,5-thiadiazepane-3-carboxylate 1,1-dioxide (**7e**)

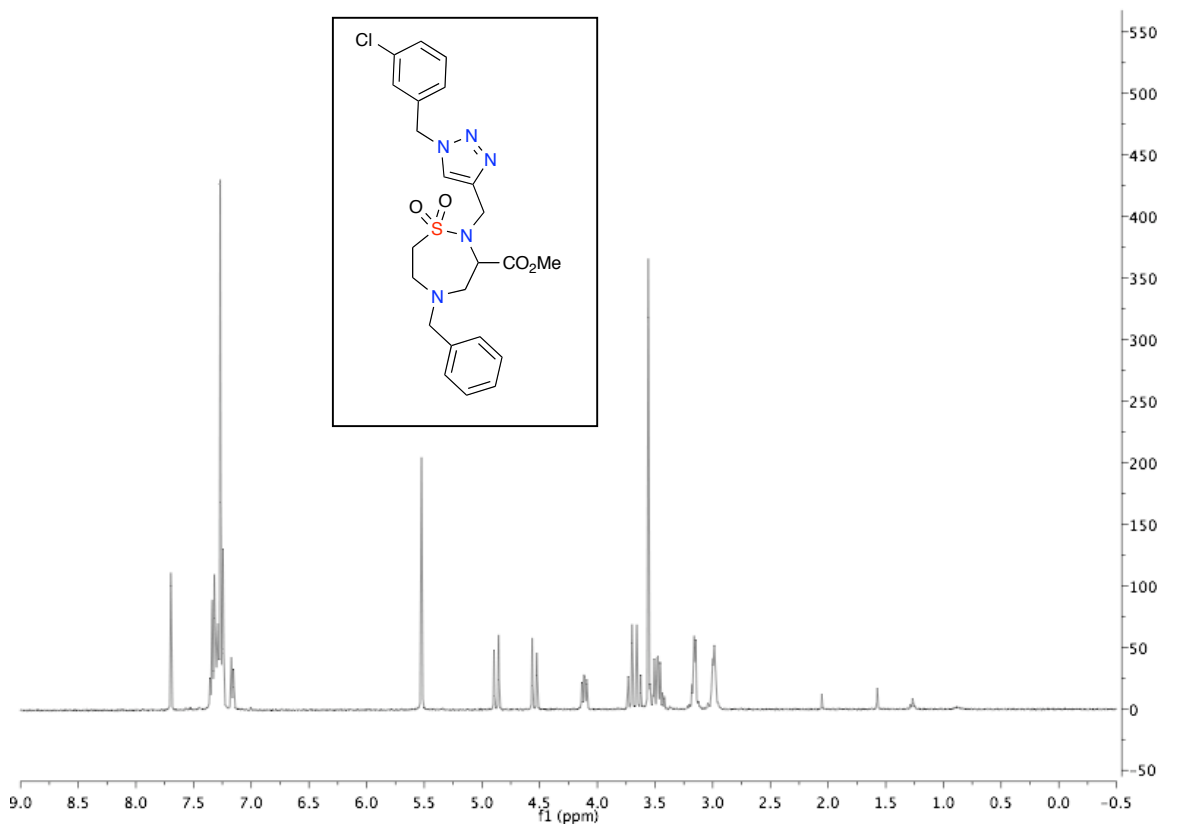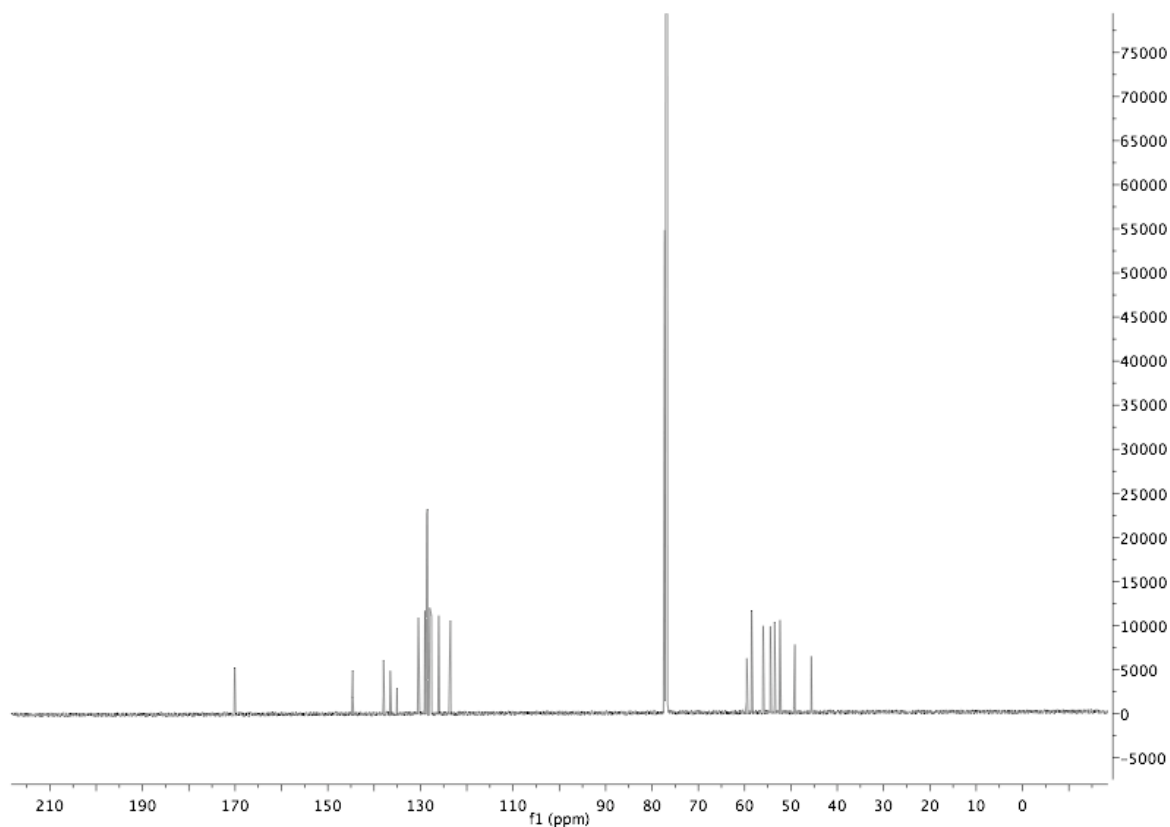

Methyl 5-benzyl-2-((1-(2-bromobenzyl)-1H-1,2,3-triazol-4-yl)methyl)-1,2,5-thiadiazepane-3-carboxylate 1,1-dioxide (**7f**)

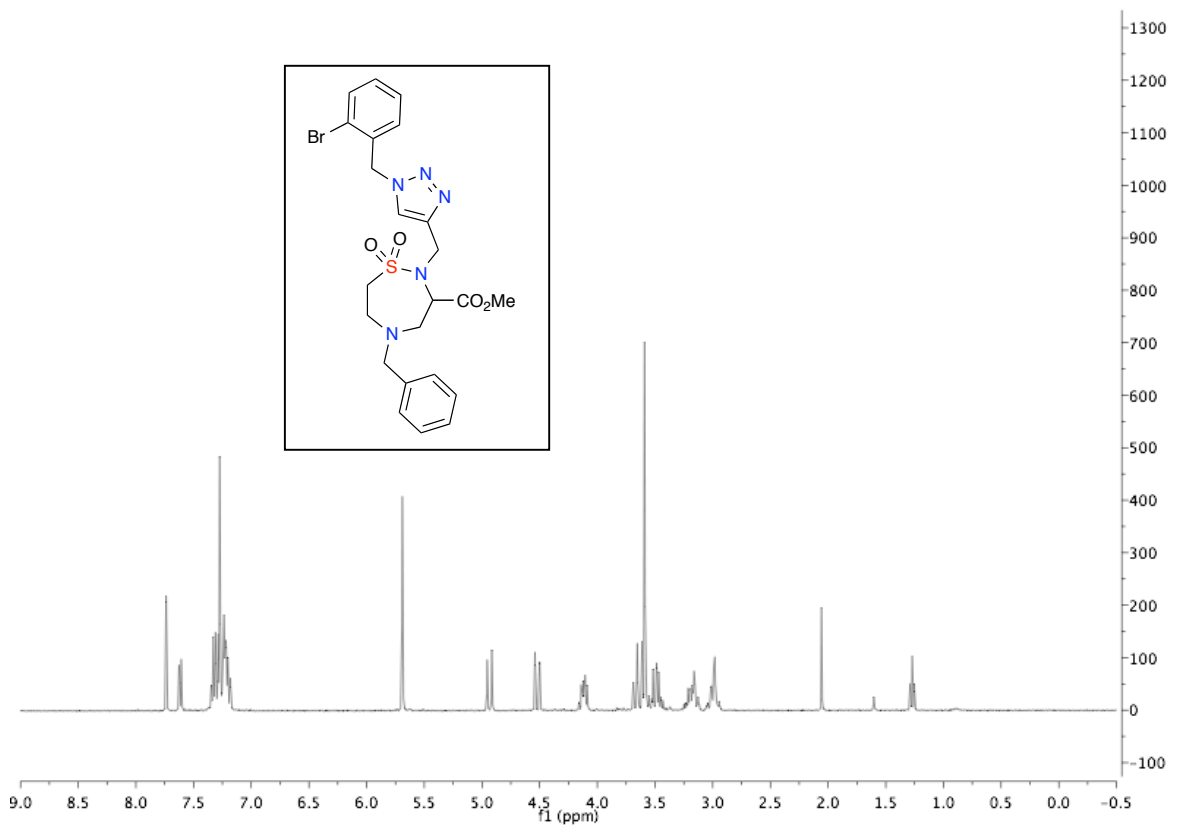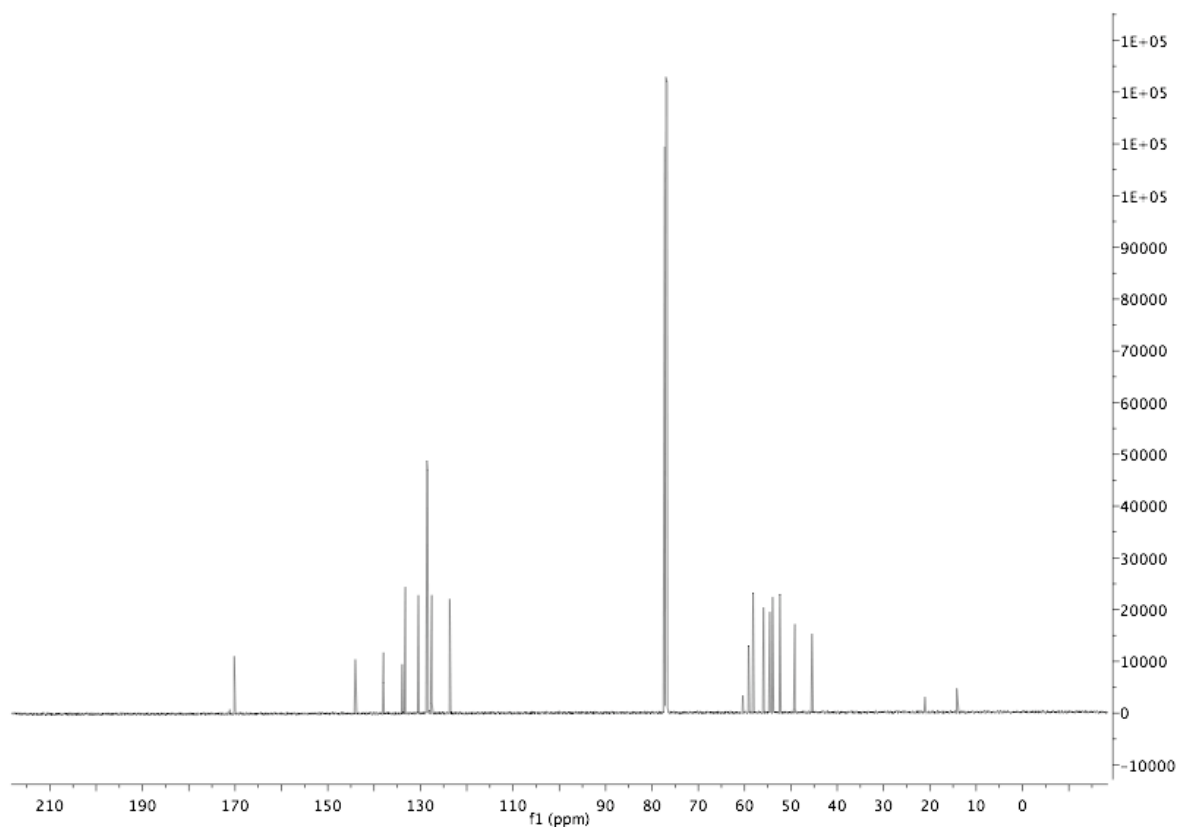

Methyl 5-(2-hydroxyethyl)-2-((1-(4-methylbenzyl)-1*H*-1,2,3-triazol-4-yl)methyl)-1,2,5-thiadiazepane-3-carboxylate 1,1-dioxide (**7g**)

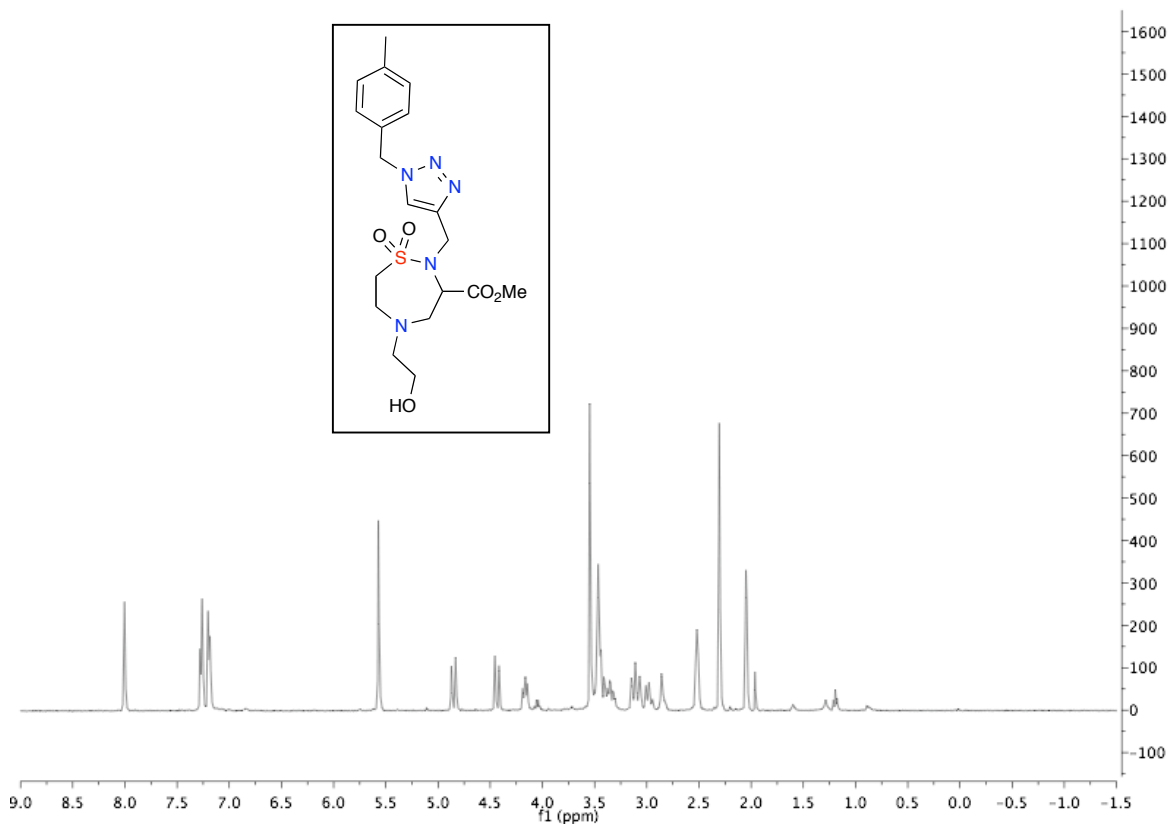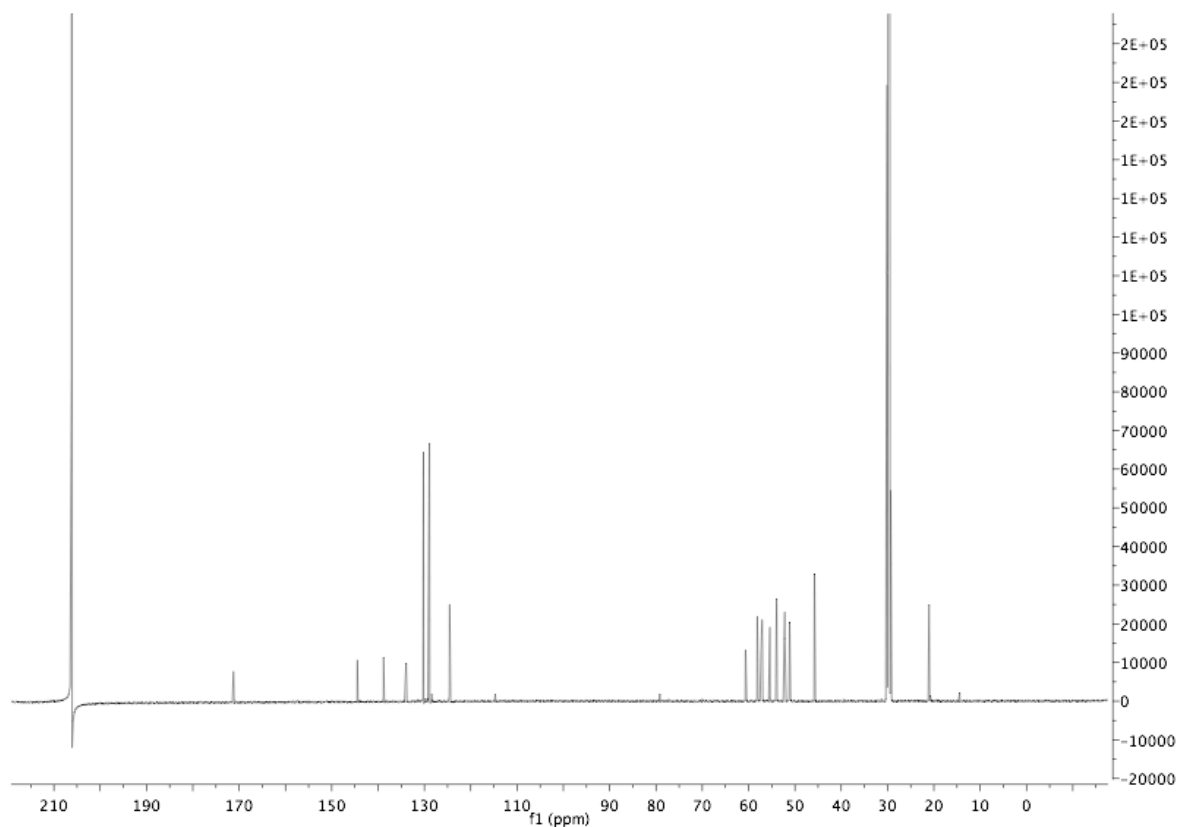

Methyl 2-((1-(3-chlorobenzyl)-1*H*-1,2,3-triazol-4-yl)methyl)-5-(2-hydroxyethyl)-1,2,5-thiadiazepane-3-carboxylate 1,1-dioxide (**7h**)

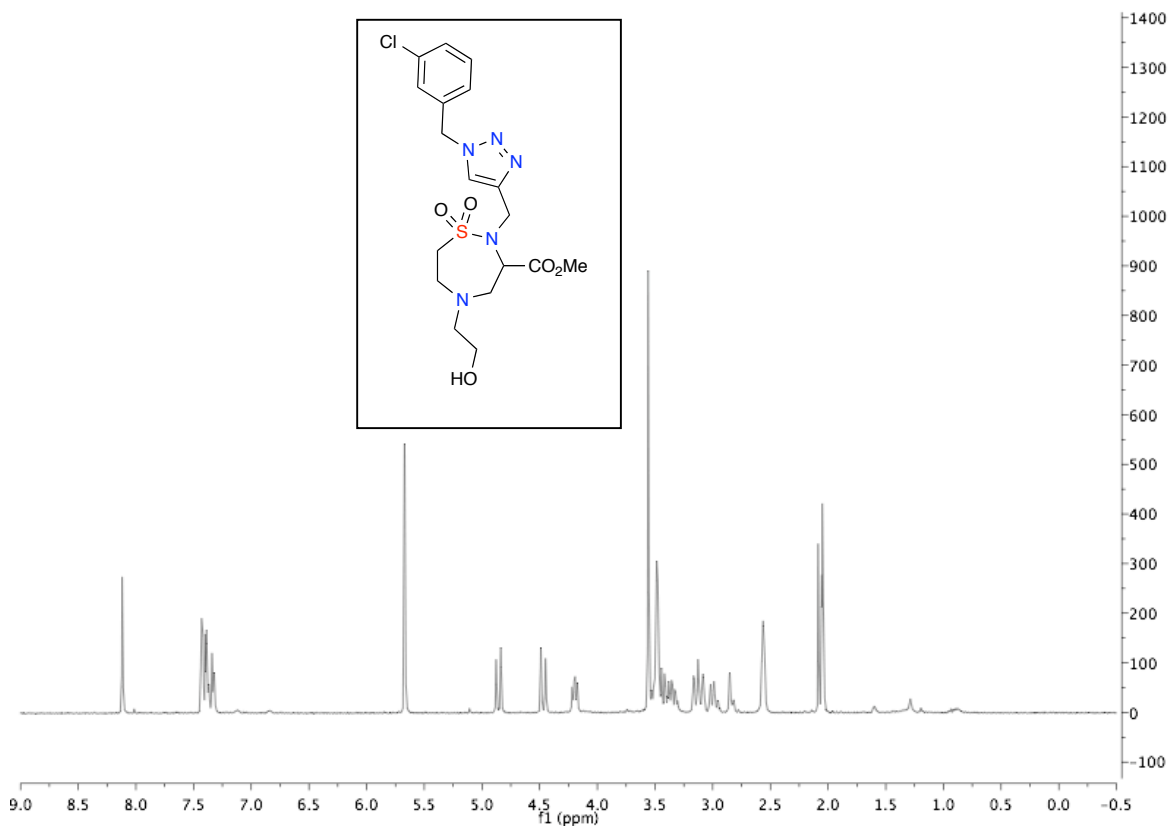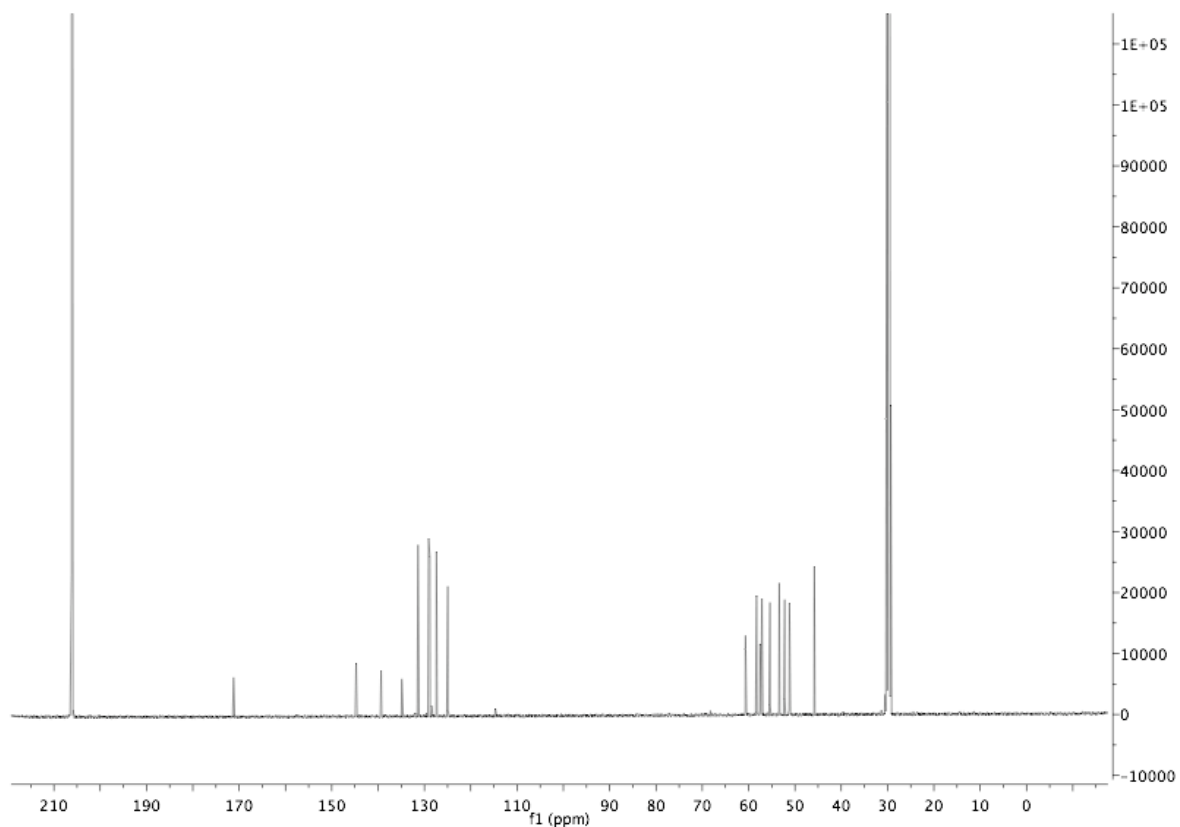

Methyl 2-((1-(2-bromobenzyl)-1*H*-1,2,3-triazol-4-yl)methyl)-5-(2-hydroxyethyl)-1,2,5-thiadiazepane-3-carboxylate 1,1-dioxide (**7i**)

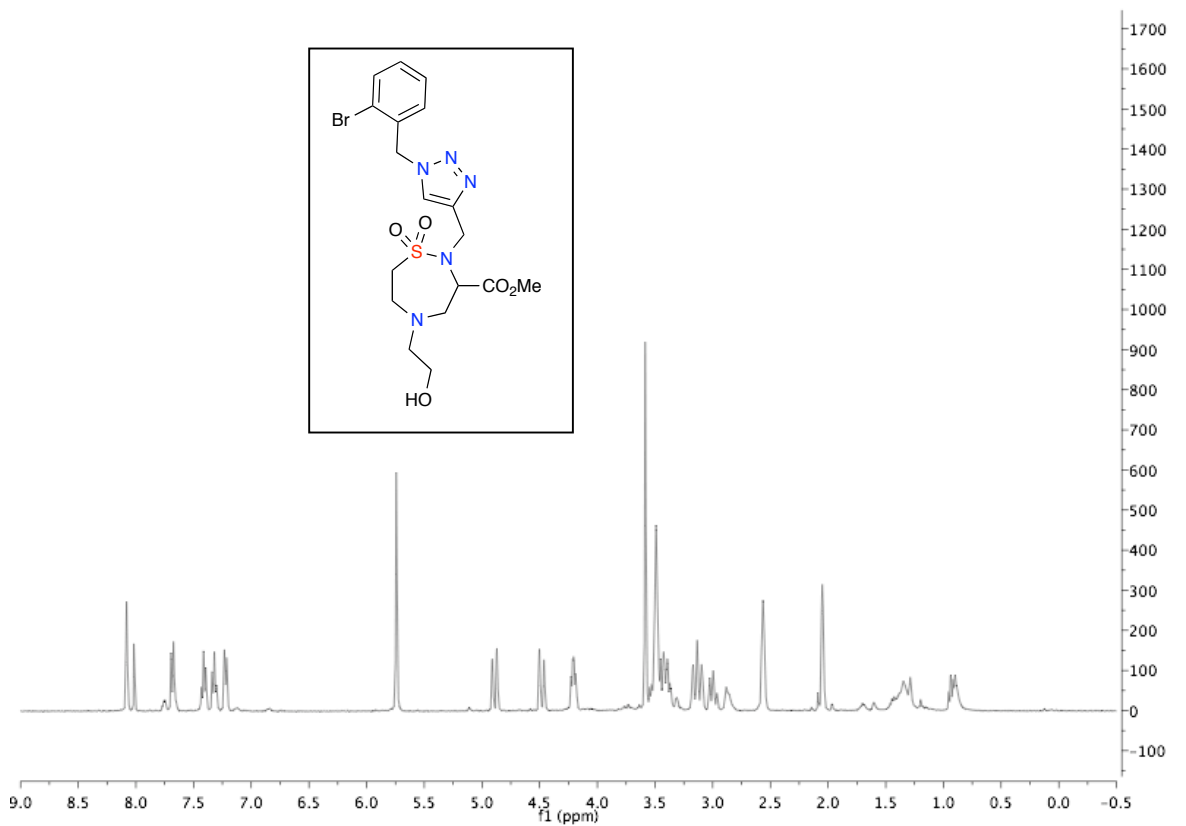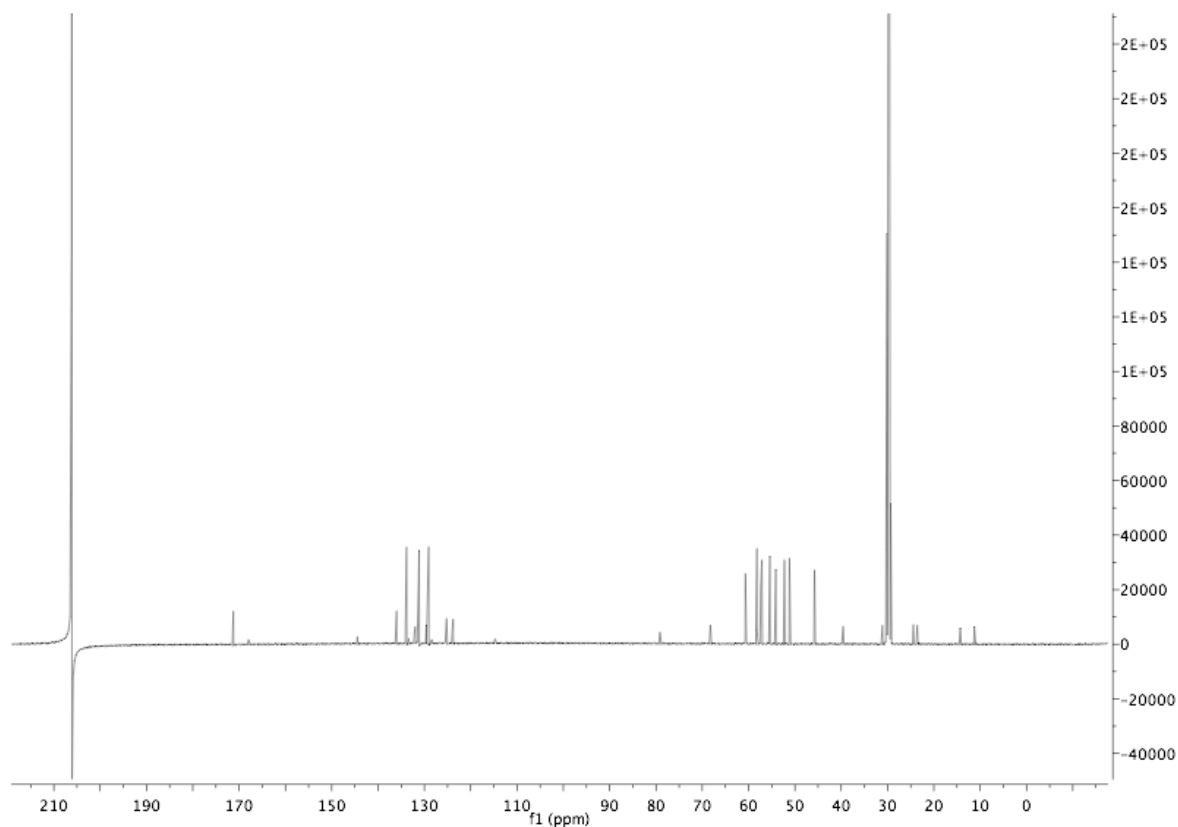

Supplement: NIHMS311382-supplement-Supp_Info.pdf [file NIHMS311382-supplement-Supp_Info.pdf]
